# Supplementary material for: Concerted conformational dynamics and water movements in the ghrelin G protein-coupled receptor
Source: eLife. 2021 Sep 3;10:e63201. doi: 10.7554/eLife.63201 (PMC8416020; doi:10.7554/eLife.63201)
Supplement: Figure 1—figure supplement 2—source data 1. [file elife-63201-fig1-figsupp2-data1.xlsx]

## Sheet: fig1S2
GHSR			BLT
replicate 1	replicate 2	replicate 3	replicate 1	replicate 2	replicate 3
2.73256	2.48521	2.53001	0.06456	0.01102	0.01087
