# Supplementary material for: Concerted conformational dynamics and water movements in the ghrelin G protein-coupled receptor
Source: eLife. 2021 Sep 3;10:e63201. doi: 10.7554/eLife.63201 (PMC8416020; doi:10.7554/eLife.63201)
Supplement: Figure 1—figure supplement 4—source data 1. [file elife-63201-fig1-figsupp4-data1.xlsx]

## Sheet: fig1S4D
cleaved		non cleaved
wavelength	absorbance	wavelength	absorbance
400	-0.0001777	400	0.00037761
399.8	9.99e-05	399.8	0.00070851
399.6	0.00013577	399.6	0.00075961
399.4	-6.11e-05	399.4	0.00038815
399.2	-0.0003968	399.2	0.00020315
399	-0.0004871	399	0.00060667
398.8	9.63e-05	398.8	0.00039072
398.6	0.00032375	398.6	0.00094335
398.4	0.0003461	398.4	0.00079735
398.2	5.75e-05	398.2	0.00057577
398	-0.0002785	398	0.00020325
397.8	0.0003232	397.8	0.00102064
397.6	0.00065629	397.6	0.0008923
397.4	-0.0003441	397.4	-2.3e-05
397.2	-6.3e-05	397.2	0.00084496
397	-7.77e-05	397	0.00090218
396.8	0.00016039	396.8	0.00052093
396.6	0.00010099	396.6	0.00068032
396.4	-0.0002583	396.4	0.00063013
396.2	-0.0001268	396.2	0.00048397
396	-0.0003239	396	0.00075031
395.8	0.00017368	395.8	0.00120264
395.6	-5.27e-05	395.6	0.00055297
395.4	0.00032087	395.4	0.00104973
395.2	2.44e-05	395.2	0.00082071
395	-0.000194	395	0.00061696
394.8	-0.0004891	394.8	0.00084411
394.6	-0.0001436	394.6	0.00132116
394.4	0.000128	394.4	0.00055382
394.2	-0.0001166	394.2	0.00080417
394	0.00044842	394	0.00181487
393.8	-0.000263	393.8	0.00025948
393.6	0.00017093	393.6	0.00099537
393.4	0.00013442	393.4	0.00109013
393.2	-4.66e-05	393.2	0.0005462
393	-0.0001071	393	0.00095881
392.8	-0.0003126	392.8	0.00133842
392.6	-4.09e-06	392.6	0.00080933
392.4	0.00015653	392.4	0.00094851
392.2	-0.0005521	392.2	0.00069793
392	7.66e-05	392	0.00098566
391.8	0.00040554	391.8	0.0005398
391.6	0.00034183	391.6	0.00104609
391.4	0.00052394	391.4	0.0014624
391.2	2.17e-05	391.2	0.00108281
391	-0.0004901	391	0.00147934
390.8	-2.7e-05	390.8	0.00110941
390.6	-0.0003727	390.6	0.00048561
390.4	-0.0004188	390.4	0.00111331
390.2	0.00038491	390.2	0.00216802
390	9.69e-05	390	0.00139623
389.8	0.00027137	389.8	0.00167156
389.6	-0.0001564	389.6	0.00151825
389.4	-0.000568	389.4	0.00096961
389.2	0.00055558	389.2	0.00178976
389	-0.0003134	389	0.00117848
388.8	1.31e-05	388.8	0.00151373
388.6	-0.000209	388.6	0.00166195
388.4	0.00059833	388.4	0.00198907
388.2	0.0002407	388.2	0.001582
388	7.41e-05	388	0.00172632
387.8	0.00072212	387.8	0.00194109
387.6	-0.0001979	387.6	0.00122279
387.4	-8.77e-05	387.4	0.00118694
387.2	-7.57e-05	387.2	0.0021495
387	0.00041702	387	0.00185511
386.8	0.000566	386.8	0.00192965
386.6	-4.86e-05	386.6	0.00217866
386.4	0.00025469	386.4	0.00195222
386.2	0.00011562	386.2	0.00170989
386	0.00064937	386	0.00255661
385.8	2.02e-05	385.8	0.00187048
385.6	0.00028468	385.6	0.00233642
385.4	0.00064263	385.4	0.0024615
385.2	0.00024601	385.2	0.00265132
385	9.39e-05	385	0.00185449
384.8	0.00043609	384.8	0.00262686
384.6	0.00015884	384.6	0.00251672
384.4	0.00035621	384.4	0.00230212
384.2	0.00047991	384.2	0.00279943
384	0.00070716	384	0.0025922
383.8	0.00020442	383.8	0.00210733
383.6	0.00079219	383.6	0.00279141
383.4	0.00012321	383.4	0.0026065
383.2	0.00060784	383.2	0.00223525
383	-0.0001229	383	0.00262525
382.8	0.00054643	382.8	0.00325242
382.6	0.00018083	382.6	0.00218038
382.4	0.00053332	382.4	0.00278114
382.2	0.00056038	382.2	0.00285913
382	1.08e-05	382	0.00261947
381.8	0.00012274	381.8	0.00290322
381.6	0.00033408	381.6	0.0032114
381.4	0.00047122	381.4	0.0028073
381.2	0.00054226	381.2	0.0030432
381	0.0008487	381	0.00363781
380.8	0.00027114	380.8	0.00330926
380.6	0.00073711	380.6	0.00317166
380.4	0.00052503	380.4	0.0033991
380.2	0.00088921	380.2	0.00414506
380	0.00046495	380	0.0036163
379.8	0.00084003	379.8	0.0039682
379.6	0.00069681	379.6	0.00333226
379.4	0.00061919	379.4	0.00360784
379.2	0.00027893	379.2	0.00420583
379	5.46e-05	379	0.0037426
378.8	0.00057399	378.8	0.00379759
378.6	0.00037447	378.6	0.00412507
378.4	0.00121622	378.4	0.00463292
378.2	0.00060118	378.2	0.00458154
378	0.00158722	378	0.00543214
377.8	0.0006971	377.8	0.00386175
377.6	8.26e-05	377.6	0.00381456
377.4	0.00047055	377.4	0.00483851
377.2	0.00063693	377.2	0.00519811
377	0.0014081	377	0.00507068
376.8	0.00062311	376.8	0.00552615
376.6	0.00049965	376.6	0.00537207
376.4	0.00015586	376.4	0.00466801
376.2	0.00059978	376.2	0.00553753
376	0.00075015	376	0.00564538
375.8	0.0006817	375.8	0.00556639
375.6	0.00024943	375.6	0.00557376
375.4	0.00078179	375.4	0.00616273
375.2	0.00078386	375.2	0.00567748
375	0.00046819	375	0.00600123
374.8	0.00076815	374.8	0.00671774
374.6	0.00032274	374.6	0.00602155
374.4	0.00092021	374.4	0.00685231
374.2	0.00098613	374.2	0.00754394
374	0.00054952	374	0.00672736
373.8	0.00111102	373.8	0.00706464
373.6	0.00091347	373.6	0.00705914
373.4	0.00076586	373.4	0.00660684
373.2	0.00029927	373.2	0.0070434
373	0.00081011	373	0.00786925
372.8	0.00113757	372.8	0.00815526
372.6	0.00107791	372.6	0.00777347
372.4	0.00129867	372.4	0.00901187
372.2	3.03e-05	372.2	0.00793855
372	0.00094275	372	0.00867662
371.8	0.0004663	371.8	0.00860366
371.6	0.0017218	371.6	0.00939499
371.4	0.00126684	371.4	0.00887557
371.2	0.00109737	371.2	0.00962582
371	0.00092773	371	0.00908759
370.8	0.00092545	370.8	0.00898121
370.6	0.00102723	370.6	0.00981753
370.4	0.00114235	370.4	0.0102878
370.2	0.00097861	370.2	0.0102571
370	0.00085695	370	0.0102777
369.8	0.00033468	369.8	0.0102533
369.6	0.00039929	369.6	0.0105574
369.4	0.00053311	369.4	0.010989
369.2	0.00015705	369.2	0.0102499
369	0.00022625	369	0.0111138
368.8	0.00080007	368.8	0.011382
368.6	0.00043383	368.6	0.0115386
368.4	0.0003488	368.4	0.0112005
368.2	0.00018572	368.2	0.0120182
368	0.00027704	368	0.0117148
367.8	0.0007146	367.8	0.0116753
367.6	0.00014291	367.6	0.0125329
367.4	0.00094929	367.4	0.0134821
367.2	0.00105598	367.2	0.0132066
367	0.00064597	367	0.0127444
366.8	0.00175057	366.8	0.0142273
366.6	0.00061678	366.6	0.0134847
366.4	0.00155158	366.4	0.0142842
366.2	0.00087565	366.2	0.0141321
366	0.00179595	366	0.0139749
365.8	0.0015195	365.8	0.0149957
365.6	0.00128943	365.6	0.0158514
365.4	0.00138184	365.4	0.0150774
365.2	0.0009708	365.2	0.0156103
365	0.00040072	365	0.0161579
364.8	0.00134232	364.8	0.0165119
364.6	0.00175114	364.6	0.0161732
364.4	0.00142924	364.4	0.0168469
364.2	0.00093539	364.2	0.016253
364	0.00085267	364	0.0172294
363.8	0.00136592	363.8	0.0173167
363.6	0.00070926	363.6	0.0170578
363.4	0.00075596	363.4	0.0167832
363.2	0.00076553	363.2	0.0180467
363	0.00069598	363	0.0191512
362.8	0.00116132	362.8	0.0187383
362.6	0.00120768	362.6	0.0188122
362.4	0.00084058	362.4	0.0193835
362.2	0.00082585	362.2	0.0194129
362	0.00119229	362	0.0196974
361.8	0.00087744	361.8	0.0195956
361.6	0.00059187	361.6	0.020015
361.4	0.00078446	361.4	0.0202433
361.2	0.00028808	361.2	0.020589
361	0.00021281	361	0.0201567
360.8	0.00052378	360.8	0.0208183
360.6	0.00103605	360.6	0.0214327
360.4	0.00111403	360.4	0.0223849
360.2	0.00113529	360.2	0.02206
360	0.00220317	360	0.0233018
359.8	0.00111642	359.8	0.0225009
359.6	0.00075176	359.6	0.0226039
359.4	0.00116342	359.4	0.022829
359.2	0.00113417	359.2	0.0237761
359	0.00114429	359	0.0234181
358.8	0.00149768	358.8	0.0246671
358.6	0.00033745	358.6	0.024309
358.4	0.00130083	358.4	0.0248737
358.2	0.00171675	358.2	0.0248988
358	0.00044013	358	0.024863
357.8	0.00047607	357.8	0.0251273
357.6	0.00050266	357.6	0.0253465
357.4	0.00152544	357.4	0.0268285
357.2	0.00154285	357.2	0.0256428
357	0.00129909	357	0.0264851
356.8	0.00114606	356.8	0.0262071
356.6	0.00043549	356.6	0.0262083
356.4	0.00192227	356.4	0.0280078
356.2	7.46e-06	356.2	0.0271587
356	0.0017397	356	0.0266325
355.8	0.00030903	355.8	0.0272298
355.6	0.00172042	355.6	0.0286007
355.4	0.00096722	355.4	0.0277621
355.2	0.00032644	355.2	0.0282904
355	0.00074989	355	0.0284637
354.8	0.00204706	354.8	0.0301251
354.6	0.00272649	354.6	0.0288718
354.4	0.00118977	354.4	0.029161
354.2	0.00216885	354.2	0.0298165
354	0.00030665	354	0.0286457
353.8	0.00156519	353.8	0.0297661
353.6	0.00220366	353.6	0.0314002
353.4	0.00298643	353.4	0.0315438
353.2	0.00093559	353.2	0.0309927
353	0.00136029	353	0.0314012
352.8	0.00220704	352.8	0.0302307
352.6	0.00195716	352.6	0.0319217
352.4	0.00172071	352.4	0.0318483
352.2	0.00167289	352.2	0.0313559
352	0.0009199	352	0.0324243
351.8	0.00164903	351.8	0.0308179
351.6	0.0018874	351.6	0.0320722
351.4	0.00130441	351.4	0.0321674
351.2	0.00180575	351.2	0.0317673
351	0.00282231	351	0.0321015
350.8	0.00292023	350.8	0.0337992
350.6	0.0012501	350.6	0.0325748
350.4	0.00026083	350.4	0.0317418
350.2	4.63e-05	350.2	0.0324446
350	0.00063731	350	0.0317495
349.8	3.09e-05	349.8	0.0345467
349.6	5.88e-05	349.6	0.0341313
349.4	-0.0001196	349.4	0.0346885
349.2	-0.0001683	349.2	0.0341456
349	0.00073044	349	0.034624
348.8	0.00166387	348.8	0.0360963
348.6	0.00036875	348.6	0.0349551
348.4	0.00059319	348.4	0.0356949
348.2	0.00058728	348.2	0.0358465
348	0.0004796	348	0.0358271
347.8	-6.26e-05	347.8	0.0358393
347.6	0.00058231	347.6	0.0364948
347.4	0.00151207	347.4	0.0367744
347.2	0.00037393	347.2	0.035645
347	0.00027575	347	0.0362603
346.8	0.00038009	346.8	0.0363544
346.6	0.00063127	346.6	0.0364535
346.4	0.00035654	346.4	0.0370781
346.2	0.00073965	346.2	0.036541
346	0.00119478	346	0.0366248
345.8	0.00146627	345.8	0.0380777
345.6	0.00132858	345.6	0.037019
345.4	0.00142908	345.4	0.0371987
345.2	0.001128	345.2	0.0374794
345	0.001629	345	0.0376787
344.8	0.00109735	344.8	0.0379881
344.6	0.00108933	344.6	0.0383209
344.4	0.00215379	344.4	0.0384528
344.2	0.00091437	344.2	0.0373276
344	0.00044684	344	0.0376986
343.8	0.00122484	343.8	0.0383769
343.6	0.0016165	343.6	0.0380267
343.4	0.00125072	343.4	0.0382986
343.2	0.00196858	343.2	0.0392343
343	0.00206272	343	0.0387883
342.8	0.00144357	342.8	0.0384389
342.6	0.00154423	342.6	0.0388935
342.4	0.00223743	342.4	0.0393171
342.2	0.00203747	342.2	0.0395485
342	0.00168697	342	0.0391029
341.8	0.00217374	341.8	0.0390042
341.6	0.0012901	341.6	0.0386242
341.4	0.00216877	341.4	0.0403055
341.2	0.00212856	341.2	0.0394086
341	0.00157943	341	0.0391819
340.8	0.00195126	340.8	0.0393057
340.6	0.00167193	340.6	0.0394979
340.4	0.00227535	340.4	0.0395825
340.2	0.0024389	340.2	0.0393211
340	0.0022627	340	0.0393092
339.8	0.00120529	339.8	0.0390133
339.6	0.00247391	339.6	0.0394424
339.4	0.00203578	339.4	0.0388423
339.2	0.00261004	339.2	0.0394123
339	0.00230116	339	0.039573
338.8	0.002917	338.8	0.0389794
338.6	0.00235522	338.6	0.0384494
338.4	0.00246634	338.4	0.0395245
338.2	0.00258858	338.2	0.0393693
338	0.00308523	338	0.0397994
337.8	0.00251541	337.8	0.0389896
337.6	0.00259447	337.6	0.0396945
337.4	0.00254473	337.4	0.039044
337.2	0.00314402	337.2	0.0394726
337	0.00380232	337	0.0399819
336.8	0.0031247	336.8	0.0389603
336.6	0.00265963	336.6	0.0389793
336.4	0.002931	336.4	0.0394395
336.2	0.0037404	336.2	0.0397844
336	0.00327848	336	0.0393355
335.8	0.00336886	335.8	0.0393337
335.6	0.00328876	335.6	0.0392109
335.4	0.00388427	335.4	0.0394382
335.2	0.00292164	335.2	0.0388015
335	0.00457189	335	0.0390852
334.8	0.00366488	334.8	0.0389883
334.6	0.00466861	334.6	0.0393117
334.4	0.0035362	334.4	0.0382306
334.2	0.003643	334.2	0.0374037
334	0.0041586	334	0.037956
333.8	0.0035368	333.8	0.0381687
333.6	0.00435743	333.6	0.0386597
333.4	0.00367811	333.4	0.0379108
333.2	0.00423918	333.2	0.0380073
333	0.00407571	333	0.0377889
332.8	0.00392269	332.8	0.0377123
332.6	0.00409685	332.6	0.0375308
332.4	0.00423348	332.4	0.0374276
332.2	0.00391762	332.2	0.0375
332	0.00499368	332	0.0380239
331.8	0.00510072	331.8	0.0376939
331.6	0.00426386	331.6	0.0369753
331.4	0.00514467	331.4	0.0377899
331.2	0.00395832	331.2	0.0364199
331	0.00417885	331	0.0366279
330.8	0.00532982	330.8	0.0371603
330.6	0.00530433	330.6	0.0362931
330.4	0.00399826	330.4	0.0362833
330.2	0.00586483	330.2	0.0366821
330	0.00504001	330	0.0362796
329.8	0.00434378	329.8	0.0355898
329.6	0.00520149	329.6	0.0357996
329.4	0.00463658	329.4	0.0364577
329.2	0.00529136	329.2	0.0355375
329	0.00522284	329	0.0353734
328.8	0.00571524	328.8	0.036016
328.6	0.0054432	328.6	0.03513
328.4	0.00544103	328.4	0.0357973
328.2	0.00536436	328.2	0.0350683
328	0.00544318	328	0.0351197
327.8	0.00533158	327.8	0.0350582
327.6	0.0060457	327.6	0.0351785
327.4	0.00612537	327.4	0.0352108
327.2	0.00690039	327.2	0.0350952
327	0.00636978	327	0.0347751
326.8	0.00625505	326.8	0.0350083
326.6	0.0065804	326.6	0.0347575
326.4	0.00729902	326.4	0.035009
326.2	0.00650582	326.2	0.0337956
326	0.0072707	326	0.034629
325.8	0.00624794	325.8	0.0337328
325.6	0.00631832	325.6	0.0328661
325.4	0.00627515	325.4	0.0332136
325.2	0.00692498	325.2	0.0335651
325	0.00707971	325	0.0334563
324.8	0.00709163	324.8	0.0330118
324.6	0.00700952	324.6	0.0336413
324.4	0.00678862	324.4	0.0328891
324.2	0.00727717	324.2	0.0331442
324	0.0073225	324	0.0336459
323.8	0.00715679	323.8	0.0327597
323.6	0.00740984	323.6	0.0322315
323.4	0.00760205	323.4	0.0326705
323.2	0.00786223	323.2	0.0322389
323	0.0080321	323	0.0328025
322.8	0.00748923	322.8	0.0325435
322.6	0.00825371	322.6	0.0327958
322.4	0.00891185	322.4	0.0327279
322.2	0.00808128	322.2	0.0328123
322	0.00862388	322	0.0315113
321.8	0.00896366	321.8	0.0318324
321.6	0.00976243	321.6	0.0328382
321.4	0.00923705	321.4	0.0323642
321.2	0.00956617	321.2	0.0321015
321	0.00937735	321	0.0316249
320.8	0.00924204	320.8	0.0325396
320.6	0.00974657	320.6	0.0320241
320.4	0.00934955	320.4	0.0319224
320.2	0.0101703	320.2	0.0317516
320	0.0100809	320	0.0316338
319.8	0.0106115	319.8	0.0322952
319.6	0.0107012	319.6	0.0319066
319.4	0.0109327	319.4	0.0316097
319.2	0.0106038	319.2	0.0318372
319	0.0112323	319	0.032518
318.8	0.0114893	318.8	0.0321875
318.6	0.011614	318.6	0.0319745
318.4	0.0110712	318.4	0.0318661
318.2	0.0117685	318.2	0.0315881
318	0.0119755	318	0.0317797
317.8	0.0119812	317.8	0.0320032
317.6	0.0129122	317.6	0.0324864
317.4	0.0125433	317.4	0.0321714
317.2	0.0129162	317.2	0.0326259
317	0.0133878	317	0.0314107
316.8	0.0131615	316.8	0.03244
316.6	0.0130774	316.6	0.0325185
316.4	0.0135276	316.4	0.0320697
316.2	0.0135379	316.2	0.0317926
316	0.0138356	316	0.0321576
315.8	0.0143288	315.8	0.032459
315.6	0.0140194	315.6	0.0318712
315.4	0.0148457	315.4	0.0328948
315.2	0.0145269	315.2	0.0325524
315	0.0148282	315	0.032723
314.8	0.0147978	314.8	0.0327844
314.6	0.0152361	314.6	0.0329946
314.4	0.0148757	314.4	0.032817
314.2	0.0159415	314.2	0.0329904
314	0.0156349	314	0.0336332
313.8	0.0160601	313.8	0.0331359
313.6	0.0163598	313.6	0.0335998
313.4	0.015903	313.4	0.0329895
313.2	0.016681	313.2	0.0330243
313	0.0159711	313	0.0327999
312.8	0.0170875	312.8	0.0337586
312.6	0.0169286	312.6	0.0339361
312.4	0.0167319	312.4	0.0338919
312.2	0.0174957	312.2	0.0338087
312	0.0165862	312	0.0334845
311.8	0.0178606	311.8	0.0339356
311.6	0.0179405	311.6	0.0348119
311.4	0.0182573	311.4	0.0345503
311.2	0.0187323	311.2	0.0345649
311	0.0177931	311	0.034648
310.8	0.0185824	310.8	0.0346494
310.6	0.0191292	310.6	0.0342495
310.4	0.0195339	310.4	0.0357171
310.2	0.0194482	310.2	0.0351744
310	0.0198156	310	0.0357772
309.8	0.0213786	309.8	0.0350868
309.6	0.0208976	309.6	0.0351429
309.4	0.0210852	309.4	0.0350218
309.2	0.0219438	309.2	0.0362372
309	0.0228897	309	0.0360774
308.8	0.0221851	308.8	0.0358151
308.6	0.0232443	308.6	0.0368683
308.4	0.0232522	308.4	0.0367045
308.2	0.0227656	308.2	0.036395
308	0.0226592	308	0.0366137
307.8	0.0233898	307.8	0.0370413
307.6	0.0236358	307.6	0.037217
307.4	0.0244893	307.4	0.0381541
307.2	0.0244562	307.2	0.037949
307	0.0247185	307	0.0385917
306.8	0.0254174	306.8	0.0388083
306.6	0.0258159	306.6	0.0392403
306.4	0.0258665	306.4	0.0391982
306.2	0.026166	306.2	0.0402191
306	0.0276234	306	0.0408232
305.8	0.0270671	305.8	0.0412278
305.6	0.0274765	305.6	0.0415961
305.4	0.0282121	305.4	0.0421531
305.2	0.0286835	305.2	0.0424499
305	0.0289069	305	0.0423697
304.8	0.0299662	304.8	0.0442086
304.6	0.0304193	304.6	0.0439042
304.4	0.0306518	304.4	0.0444816
304.2	0.0321642	304.2	0.0457285
304	0.0315447	304	0.045353
303.8	0.0317988	303.8	0.0461666
303.6	0.0333407	303.6	0.0464875
303.4	0.0337476	303.4	0.0473585
303.2	0.0342607	303.2	0.0481657
303	0.0344959	303	0.049157
302.8	0.0356445	302.8	0.0498605
302.6	0.0361513	302.6	0.0501796
302.4	0.0360448	302.4	0.0514795
302.2	0.0375005	302.2	0.0522351
302	0.0380302	302	0.052662
301.8	0.0388934	301.8	0.0535091
301.6	0.0401953	301.6	0.0550343
301.4	0.0400366	301.4	0.0545936
301.2	0.0413237	301.2	0.056399
301	0.0432845	301	0.0579657
300.8	0.0429651	300.8	0.0584224
300.6	0.0442254	300.6	0.0593494
300.4	0.0452481	300.4	0.0611121
300.2	0.04615	300.2	0.0618014
300	0.047544	300	0.0630508
299.8	0.0480991	299.8	0.0644689
299.6	0.0489869	299.6	0.0653805
299.4	0.0506237	299.4	0.06623
299.2	0.0521918	299.2	0.0681757
299	0.0530476	299	0.0690844
298.8	0.054222	298.8	0.0707344
298.6	0.0556839	298.6	0.0721056
298.4	0.0569037	298.4	0.0736417
298.2	0.0577688	298.2	0.0749768
298	0.0588509	298	0.0763111
297.8	0.0609662	297.8	0.0781989
297.6	0.0619805	297.6	0.079566
297.4	0.0645654	297.4	0.0821589
297.2	0.0650607	297.2	0.0831677
297	0.066854	297	0.0853812
296.8	0.0688054	296.8	0.0871939
296.6	0.0701005	296.6	0.0889634
296.4	0.0715504	296.4	0.0904046
296.2	0.0739353	296.2	0.0936816
296	0.0760156	296	0.0953549
295.8	0.0780633	295.8	0.0970748
295.6	0.0799315	295.6	0.0996423
295.4	0.0819296	295.4	0.102254
295.2	0.084209	295.2	0.104185
295	0.0864276	295	0.106897
294.8	0.0893525	294.8	0.109805
294.6	0.0912852	294.6	0.111742
294.4	0.0940339	294.4	0.11506
294.2	0.0962434	294.2	0.117602
294	0.0994245	294	0.120485
293.8	0.101429	293.8	0.123974
293.6	0.10418	293.6	0.126889
293.4	0.107049	293.4	0.129156
293.2	0.110231	293.2	0.133228
293	0.113769	293	0.136879
292.8	0.115516	292.8	0.139036
292.6	0.118841	292.6	0.142438
292.4	0.121389	292.4	0.145119
292.2	0.12441	292.2	0.148031
292	0.126436	292	0.150727
291.8	0.129295	291.8	0.154365
291.6	0.131568	291.6	0.155722
291.4	0.133528	291.4	0.158355
291.2	0.135311	291.2	0.160086
291	0.136678	291	0.161714
290.8	0.138587	290.8	0.163667
290.6	0.140028	290.6	0.165112
290.4	0.140971	290.4	0.166137
290.2	0.141582	290.2	0.167346
290	0.142996	290	0.169124
289.8	0.144107	289.8	0.169558
289.6	0.144619	289.6	0.1693
289.4	0.145584	289.4	0.17116
289.2	0.146097	289.2	0.171598
289	0.146409	289	0.172198
288.8	0.14692	288.8	0.173232
288.6	0.14787	288.6	0.174197
288.4	0.148492	288.4	0.175302
288.2	0.149807	288.2	0.176568
288	0.150969	288	0.177612
287.8	0.151487	287.8	0.178587
287.6	0.153583	287.6	0.180726
287.4	0.155206	287.4	0.182303
287.2	0.156353	287.2	0.183458
287	0.157853	287	0.185669
286.8	0.159931	286.8	0.188182
286.6	0.161305	286.6	0.18949
286.4	0.163185	286.4	0.19165
286.2	0.165528	286.2	0.193637
286	0.167892	286	0.196255
285.8	0.169965	285.8	0.198945
285.6	0.17222	285.6	0.20084
285.4	0.173794	285.4	0.202441
285.2	0.175612	285.2	0.204458
285	0.177539	285	0.206656
284.8	0.178987	284.8	0.208045
284.6	0.180621	284.6	0.210153
284.4	0.182038	284.4	0.212146
284.2	0.183477	284.2	0.21334
284	0.184763	284	0.214616
283.8	0.186718	283.8	0.216298
283.6	0.18745	283.6	0.217278
283.4	0.187688	283.4	0.217376
283.2	0.189162	283.2	0.219732
283	0.190175	283	0.220483
282.8	0.190313	282.8	0.220572
282.6	0.191443	282.6	0.221564
282.4	0.19123	282.4	0.222282
282.2	0.192357	282.2	0.222486
282	0.192438	282	0.223197
281.8	0.193608	281.8	0.22392
281.6	0.19362	281.6	0.223835
281.4	0.193878	281.4	0.224804
281.2	0.194254	281.2	0.224842
281	0.194115	281	0.224674
280.8	0.194704	280.8	0.225184
280.6	0.19434	280.6	0.225293
280.4	0.195269	280.4	0.225251
280.2	0.195638	280.2	0.225945
280	0.195315	280	0.22626
279.8	0.194993	279.8	0.226049
279.6	0.196055	279.6	0.226971
279.4	0.194983	279.4	0.225502
279.2	0.195143	279.2	0.22554
279	0.194857	279	0.225887
278.8	0.195226	278.8	0.227068
278.6	0.195415	278.6	0.226272
278.4	0.19534	278.4	0.226678
278.2	0.195726	278.2	0.227273
278	0.195196	278	0.226445
277.8	0.195241	277.8	0.226761
277.6	0.195842	277.6	0.226711
277.4	0.19543	277.4	0.226565
277.2	0.194065	277.2	0.225934
277	0.195007	277	0.226683
276.8	0.194776	276.8	0.225944
276.6	0.1946	276.6	0.225937
276.4	0.194322	276.4	0.225913
276.2	0.194198	276.2	0.225784
276	0.194746	276	0.225981
275.8	0.193766	275.8	0.225619
275.6	0.194164	275.6	0.226172
275.4	0.193946	275.4	0.225778
275.2	0.194072	275.2	0.226188
275	0.193746	275	0.2257
274.8	0.193295	274.8	0.225496
274.6	0.193242	274.6	0.225797
274.4	0.192921	274.4	0.225139
274.2	0.192791	274.2	0.22496
274	0.192253	274	0.22452
273.8	0.192573	273.8	0.224911
273.6	0.191145	273.6	0.224142
273.4	0.191197	273.4	0.223922
273.2	0.190655	273.2	0.223056
273	0.190812	273	0.22327
272.8	0.189402	272.8	0.222553
272.6	0.189664	272.6	0.222436
272.4	0.188657	272.4	0.221684
272.2	0.187596	272.2	0.220663
272	0.187846	272	0.220607
271.8	0.186752	271.8	0.219866
271.6	0.186837	271.6	0.219369
271.4	0.186574	271.4	0.219781
271.2	0.186115	271.2	0.219123
271	0.185208	271	0.218822
270.8	0.185199	270.8	0.218736
270.6	0.184803	270.6	0.218322
270.4	0.18351	270.4	0.217245
270.2	0.183571	270.2	0.217383
270	0.183502	270	0.216954
269.8	0.182692	269.8	0.216921
269.6	0.182583	269.6	0.216683
269.4	0.181913	269.4	0.215912
269.2	0.180872	269.2	0.21557
269	0.180905	269	0.215738
268.8	0.180849	268.8	0.21541
268.6	0.179909	268.6	0.214244
268.4	0.179381	268.4	0.214592
268.2	0.178764	268.2	0.213786
268	0.177793	268	0.212809
267.8	0.176906	267.8	0.212942
267.6	0.177001	267.6	0.212484
267.4	0.176206	267.4	0.2119
267.2	0.175923	267.2	0.211763
267	0.175589	267	0.211667
266.8	0.17482	266.8	0.210393
266.6	0.173833	266.6	0.210007
266.4	0.173833	266.4	0.21013
266.2	0.173071	266.2	0.209397
266	0.172198	266	0.209176
265.8	0.172143	265.8	0.209579
265.6	0.172159	265.6	0.20859
265.4	0.171473	265.4	0.20876
265.2	0.171208	265.2	0.208683
265	0.169845	265	0.207541
264.8	0.169396	264.8	0.207327
264.6	0.16886	264.6	0.20679
264.4	0.168585	264.4	0.206181
264.2	0.167838	264.2	0.206066
264	0.16646	264	0.205301
263.8	0.166037	263.8	0.204685
263.6	0.1653	263.6	0.203708
263.4	0.164303	263.4	0.203847
263.2	0.163549	263.2	0.203063
263	0.163182	263	0.202904
262.8	0.162329	262.8	0.202534
262.6	0.162136	262.6	0.202472
262.4	0.160563	262.4	0.20166
262.2	0.160725	262.2	0.202273
262	0.15997	262	0.201097
261.8	0.159569	261.8	0.200891
261.6	0.159069	261.6	0.200956
261.4	0.159192	261.4	0.201227
261.2	0.158506	261.2	0.200936
261	0.15839	261	0.201098
260.8	0.158025	260.8	0.20148
260.6	0.157003	260.6	0.200927
260.4	0.157463	260.4	0.201369
260.2	0.15698	260.2	0.201263
260	0.157174	260	0.201519
259.8	0.156918	259.8	0.201689
259.6	0.156495	259.6	0.201478
259.4	0.155927	259.4	0.201167
259.2	0.154951	259.2	0.201717
259	0.155034	259	0.201669
258.8	0.15458	258.8	0.201503
258.6	0.154039	258.6	0.201204
258.4	0.153695	258.4	0.201926
258.2	0.153115	258.2	0.201283
258	0.152287	258	0.200754
257.8	0.152513	257.8	0.201509
257.6	0.152162	257.6	0.200645
257.4	0.150334	257.4	0.200078
257.2	0.149619	257.2	0.201285
257	0.150417	257	0.201231
256.8	0.149806	256.8	0.201133
256.6	0.149643	256.6	0.202286
256.4	0.149079	256.4	0.200996
256.2	0.148394	256.2	0.20144
256	0.148093	256	0.201791
255.8	0.148167	255.8	0.202584
255.6	0.147828	255.6	0.20273
255.4	0.148039	255.4	0.203961
255.2	0.148075	255.2	0.204063
255	0.147897	255	0.205047
254.8	0.148344	254.8	0.205512
254.6	0.148408	254.6	0.206246
254.4	0.148234	254.4	0.207206
254.2	0.148629	254.2	0.208373
254	0.148986	254	0.209662
253.8	0.148855	253.8	0.210305
253.6	0.149374	253.6	0.211673
253.4	0.149833	253.4	0.212507
253.2	0.149585	253.2	0.213196
253	0.149614	253	0.214537
252.8	0.150779	252.8	0.216504
252.6	0.150947	252.6	0.217847
252.4	0.151429	252.4	0.218334
252.2	0.151658	252.2	0.220019
252	0.151639	252	0.220701
251.8	0.152028	251.8	0.222031
251.6	0.152079	251.6	0.222992
251.4	0.153251	251.4	0.224678
251.2	0.15326	251.2	0.225603
251	0.15395	251	0.227874
250.8	0.154077	250.8	0.229287
250.6	0.154954	250.6	0.230511
250.4	0.154588	250.4	0.231885
250.2	0.15581	250.2	0.23424
250	0.156499	250	0.235744
249.8	0.157582	249.8	0.237698
249.6	0.158917	249.6	0.239539
249.4	0.158905	249.4	0.241868
249.2	0.16037	249.2	0.244608
249	0.161463	249	0.246484
248.8	0.161931	248.8	0.248646
248.6	0.163613	248.6	0.25162
248.4	0.164901	248.4	0.254131
248.2	0.166396	248.2	0.256247
248	0.167522	248	0.25879
247.8	0.168614	247.8	0.261663
247.6	0.170193	247.6	0.264627
247.4	0.171891	247.4	0.267408
247.2	0.17274	247.2	0.270643
247	0.174755	247	0.273369
246.8	0.176464	246.8	0.276756
246.6	0.178078	246.6	0.28007
246.4	0.179566	246.4	0.283271
246.2	0.181221	246.2	0.286273
246	0.182904	246	0.29003
245.8	0.185317	245.8	0.294212
245.6	0.187452	245.6	0.297797
245.4	0.190181	245.4	0.302766
245.2	0.192962	245.2	0.307167
245	0.1952	245	0.311679
244.8	0.197443	244.8	0.315946
244.6	0.200454	244.6	0.321065
244.4	0.20264	244.4	0.326101
244.2	0.2057	244.2	0.331769
244	0.208716	244	0.337347
243.8	0.212281	243.8	0.342742
243.6	0.215381	243.6	0.349039
243.4	0.218705	243.4	0.355228
243.2	0.222361	243.2	0.361162
243	0.226359	243	0.369236
242.8	0.230549	242.8	0.376131
242.6	0.234983	242.6	0.383613
242.4	0.239278	242.4	0.392084
242.2	0.243922	242.2	0.400473
242	0.248864	242	0.409012
241.8	0.253689	241.8	0.418087
241.6	0.258592	241.6	0.428228
241.4	0.264882	241.4	0.438209
241.2	0.270376	241.2	0.449072
241	0.277277	241	0.460745
240.8	0.282511	240.8	0.471538
240.6	0.289832	240.6	0.485323
240.4	0.296301	240.4	0.497236
240.2	0.303712	240.2	0.511069
240	0.310951	240	0.525268
