# Supplementary material for: Concerted conformational dynamics and water movements in the ghrelin G protein-coupled receptor
Source: eLife. 2021 Sep 3;10:e63201. doi: 10.7554/eLife.63201 (PMC8416020; doi:10.7554/eLife.63201)
Supplement: Figure 1—figure supplement 4—source data 2. [file elife-63201-fig1-figsupp4-data2.xlsx]

## Sheet: fig1S4E
cleaved		non cleaved
wavelength	intensity	wavelength	intensity
450	128.283	450	137.605
451.06	127.592	451.06	134.682
451.96	129.459	451.96	131.155
453.03	128.975	453.03	131.984
453.93	130.397	453.93	128.467
455	130.762	455	125.654
456.06	130.344	456.06	125.169
456.96	126.446	456.96	126.563
458.03	124.45	458.03	125.403
458.93	125.749	458.93	124.386
460	125.432	460	122.049
461.06	126.777	461.06	120.812
461.96	125.837	461.96	120.091
463.03	127.448	463.03	116.759
463.93	124.677	463.93	114.45
465	123.855	465	114.697
466.06	118.536	466.06	115.021
466.96	117.022	466.96	112.577
468.03	111.313	468.03	110.198
468.93	108.851	468.93	110.286
470	106.748	470	106.528
471.04	105.286	471.04	103.146
471.94	103.433	471.94	102.281
472.98	102.64	472.98	102.96
474.02	104.711	474.02	102.016
475.07	104.448	475.07	102.126
475.97	105.052	475.97	101.96
477.01	105.579	477.01	101.095
478.05	106.629	478.05	101.458
478.95	105.884	478.95	101.341
480	108.417	480	100.056
481.06	116.357	481.06	99.2601
481.96	122.218	481.96	99.2275
483.03	132.31	483.03	97.6691
483.93	140.703	483.93	96.3945
485	148.474	485	95.2728
486.06	155.904	486.06	93.8142
486.96	167.421	486.96	90.1635
488.03	175.553	488.03	88.5268
488.93	177.459	488.93	85.8491
490	182.395	490	83.7286
491.04	177.255	491.04	81.9494
491.94	166.436	491.94	81.1097
492.98	152.77	492.98	77.2563
494.02	145.118	494.02	76.8019
495.07	132.447	495.07	77.4561
495.97	119.905	495.97	76.0993
497.01	110.076	497.01	75.7794
498.05	105.073	498.05	75.6865
498.95	97.0298	498.95	74.482
500	88.3386	500	72.1654
501.06	84.9509	501.06	70.3769
501.96	84.1278	501.96	70.6902
503.03	77.7652	503.03	70.6395
503.93	74.9193	503.93	69.6629
505	73.5999	505	69.3332
506.06	72.8958	506.06	70.277
506.96	68.5937	506.96	68.4087
508.03	69.2828	508.03	66.9811
508.93	67.5736	508.93	66.0534
510	66.2046	510	65.2167
511.04	65.9496	511.04	64.4572
511.94	65.0767	511.94	62.4729
512.98	63.6208	512.98	61.5836
514.02	61.9361	514.02	62.4863
515.07	62.5049	515.07	61.1382
515.97	58.6093	515.97	59.7429
517.01	59.4753	517.01	59.1024
518.05	58.984	518.05	58.4479
518.95	58.372	518.95	55.9693
520	55.1747	520	56.7319
521.04	56.5048	521.04	56.0092
521.94	55.0119	521.94	56.1253
522.98	52.4628	522.98	56.4585
524.02	51.7319	524.02	56.8273
525.07	53.5258	525.07	55.4778
525.97	52.2571	525.97	54.3018
527.01	51.3063	527.01	53.3127
528.05	54.0248	528.05	51.6336
528.95	54.0177	528.95	49.1531
530	52.4389	530	47.9629
531.02	51.4058	531.02	46.6528
532.05	53.2221	532.05	46.6273
532.94	53.2487	532.94	47.2411
533.97	54.1273	533.97	49.3708
535	56.6404	535	48.5649
536.02	61.5983	536.02	48.2211
537.05	66.9693	537.05	48.434
537.94	74.4706	537.94	45.617
538.97	88.8304	538.97	43.4935
540	103.698	540	43.7295
541.04	121.683	541.04	43.8857
541.94	140.392	541.94	41.8946
542.98	159.107	542.98	41.7736
544.02	175.317	544.02	42.2701
545.07	190.322	545.07	41.8401
545.97	196.407	545.97	40.9871
547.01	200.222	547.01	40.7911
548.05	200.814	548.05	40.3698
548.95	191.766	548.95	38.3994
550	174.057	550	36.4678
551.02	155.762	551.02	35.5766
552.05	133.288	552.05	35.0534
552.94	106.881	552.94	33.3954
553.97	84.1103	553.97	32.3196
555	67.389	555	33.3799
556.02	55.5849	556.02	34.2384
557.05	45.152	557.05	33.4414
557.94	39.9103	557.94	33.3066
558.97	37.095	558.97	32.9156
560	35.4489	560	30.5042
561.04	33.7094	561.04	28.5889
561.94	33.7691	561.94	29.6163
562.98	31.7119	562.98	29.771
564.02	29.946	564.02	29.4786
565.07	29.3784	565.07	29.7485
565.97	29.6125	565.97	30.661
567.01	29.3839	567.01	27.3971
568.05	29.4395	568.05	26.5821
568.95	29.7594	568.95	26.2592
570	28.3541	570	26.0101
571.02	27.6986	571.02	24.7341
572.05	27.2113	572.05	26.5122
572.94	27.3437	572.94	26.818
573.97	28.6182	573.97	26.3476
575	30.8925	575	25.6532
576.02	31.6112	576.02	24.0107
577.05	34.2458	577.05	22.5959
577.94	38.1955	577.94	22.2508
578.97	42.545	578.97	21.4287
580	46.9482	580	20.588
581.02	52.9225	581.02	21.2086
582.05	58.9851	582.05	21.6694
582.94	62.5542	582.94	21.8319
583.97	63.7621	583.97	22.3825
585	65.4241	585	23.1704
586.02	64.7161	586.02	23.6519
587.05	61.7942	587.05	22.3749
587.94	60.1459	587.94	21.8002
588.97	59.1846	588.97	21.4817
590	56.4197	590	21.5114
591.02	52.9184	591.02	22.4466
592.05	48.7793	592.05	23.6294
592.94	44.5221	592.94	24.0116
593.97	39.8312	593.97	24.278
595	34.3999	595	24.054
596.02	29.5924	596.02	23.5438
597.05	26.4555	597.05	22.6194
597.94	23.6092	597.94	20.6459
598.97	21.1751	598.97	19.9248
600	21.404	600	20.0703
601.01	21.2271	601.01	18.8789
602.02	21.6696	602.02	17.9025
603.04	21.4706	603.04	17.5934
604.05	20.4267	604.05	16.5331
605.07	20.8305	605.07	14.6889
605.94	20.8134	605.94	14.6847
606.95	19.5674	606.95	15.2677
607.97	19.0815	607.97	17.0065
608.98	19.7577	608.98	17.524
610	18.886	610	18.1097
611.02	19.3621	611.02	17.2302
612.05	20.086	612.05	17.0945
612.94	21.3625	612.94	16.9314
613.97	23.9234	613.97	17.3033
615	26.7205	615	17.7262
616.02	29.6898	616.02	18.862
617.05	32.4871	617.05	18.3121
617.94	35.6448	617.94	17.8745
618.97	37.5362	618.97	18.2987
620	39.0124	620	17.6658
621.01	39.2375	621.01	16.7076
622.02	39.4751	622.02	16.9077
623.04	37.1653	623.04	16.5886
624.05	34.3232	624.05	15.4321
625.07	29.5698	625.07	16.1944
625.94	26.1009	625.94	15.6798
626.95	22.2176	626.95	15.9401
627.97	19.9933	627.97	15.0046
628.98	18.5156	628.98	15.3689
630	17.5111	630	14.2174
631.01	18.7541	631.01	15.3377
632.02	18.145	632.02	14.9583
633.04	18.3127	633.04	16.3181
634.05	17.9034	634.05	15.3225
635.07	17.7536	635.07	15.6969
635.94	16.2535	635.94	15.1383
636.95	16.7716	636.95	15.4551
637.97	16.4694	637.97	15.4242
638.98	16.8776	638.98	15.6142
640	17.3202	640	15.3736
641.01	16.6985	641.01	15.4101
642.02	16.1315	642.02	15.3717
643.04	15.0649	643.04	14.6506
644.05	14.7235	644.05	15.0886
645.07	15.3874	645.07	15.3511
645.94	15.8661	645.94	16.024
646.95	17.0927	646.95	15.9682
647.97	19.7603	647.97	17.0623
