# Supplementary material for: Concerted conformational dynamics and water movements in the ghrelin G protein-coupled receptor
Source: eLife. 2021 Sep 3;10:e63201. doi: 10.7554/eLife.63201 (PMC8416020; doi:10.7554/eLife.63201)
Supplement: Figure 1—source data 1. [file elife-63201-fig1-data1.xlsx]

## Sheet: figure 1B
	wild type			3.43			5.58			6.40			6.44			7.45
[ghrelin]	I662/I620			I662/I620			I662/I620			I662/I620			I662/I620			I662/I620
	replicate 1	replicate 2	replicate 3	replicate 1	replicate 2	replicate 3	replicate 1	replicate 2	replicate 3	replicate 1	replicate 2	replicate 3	replicate 1	replicate 2	replicate 3	replicate 1	replicate 2	replicate 3
1e-09	2.75695	2.36589	2.53332	2.44792	2.40256	2.70816	2.49357	2.69651	2.83438	2.38887	2.598	2.3387	2.9797	2.73986	2.45871	2.20423	2.90456	2.51002
3.1e-09	3.02653	2.64856	2.47855	2.56852	2.43236	2.70256	2.41784	2.58448	2.96326	2.33225	2.79992	2.2584	2.9345	2.79884	2.21782	2.16789	2.99825	2.60225
1e-08	2.33145	2.69896	2.53202	2.62448	2.54772	2.80147	2.33987	2.78452	2.97856	2.25997	2.66225	2.08756	2.98714	2.78961	2.20325	2.17447	2.95887	2.5787
3.1e-08	1.91562	2.22256	2.21381	2.69889	2.29865	3.09536	2.17524	2.60441	2.72895	1.93887	2.05351	1.73447	2.99815	2.68778	2.19887	1.91442	2.35886	2.2741
1e-07	1.99105	1.69871	1.93784	2.14063	1.96054	2.75458	1.74564	2.20782	2.29155	1.50025	1.69779	1.4301	2.25426	1.80147	1.62778	1.81526	2.15745	1.90871
3.1e-07	0.91057	0.52782	0.60147	1.29992	1.15856	1.67125	0.79568	0.77752	1.1521	0.9082	0.71789	1.15071	1.25782	1.0087	0.71145	0.98564	1.22548	1.09821
1e-06	0.11856	0.35046	0.29478	0.40785	0.22992	0.69452	0.30787	0.40801	0.67885	0.33987	0.22131	0.55474	0.47785	0.237742	0.14845	0.35874	0.60025	0.44785
3.1e-06	0.294125	0.094785	0.24771	0.4177	0.110718	0.518756	0.21559	0.30221	0.50012	0.35449	0.23998	0.51447	0.51987	0.14887	0.154441	0.20007	0.43702	0.22365
1e-05	0.10105	0.25321	0.17771	0.60182	0.20875	0.697452	0.09952	0.11445	0.28774	0.22098	0.15714	0.33784	0.25894	0.10587	0.07478	0.22364	0.47871	0.37771
