# Supplementary material for: Concerted conformational dynamics and water movements in the ghrelin G protein-coupled receptor
Source: eLife. 2021 Sep 3;10:e63201. doi: 10.7554/eLife.63201 (PMC8416020; doi:10.7554/eLife.63201)
Supplement: Figure 1—source data 2. [file elife-63201-fig1-data2.xlsx]

## Sheet: Figure 1C
	apo			JMV3011			ghrelin			JMV3002			SPA
wt	118.524	149.49	106.597	113.744	128.236	121.376	57.801	76.69	67.016	106.739	89.273	84.36	173.228	196.781	151.954
3.43	116.55	116.443	138.242	118.485	141.264	129.319	53.466	61.251	78.054	72.682	91.137	89.174	191.65	206.223	180.939
5.58	96.406	84.511	104.725	118.001	133.949	130.506	68.599	56.976	54.311	84.079	98.309	103.043	175.492	179.214	191.05
6.4	132.031	112.371	123.165	113.744	135.773	128.151	79.164	61.008	65.787	110.222	99.484	92.102	167.326	166.591	181.592
6.44	116.318	143.412	126.193	135.378	132.795	120.989	88.762	76.771	82.644	114.924	95.27	105.042	192.637	185.333	170.255
7.45	146.099	130.14	136.976	118.137	139.866	127.083	58.556	80.742	76.076	77.558	110.912	95.189	157.961	171.595	192.811
