# Supplementary material for: Concerted conformational dynamics and water movements in the ghrelin G protein-coupled receptor
Source: eLife. 2021 Sep 3;10:e63201. doi: 10.7554/eLife.63201 (PMC8416020; doi:10.7554/eLife.63201)
Supplement: Figure 1—source data 3. [file elife-63201-fig1-data3.xlsx]

## Sheet: figure 1D
wavelength (nm)	3.43	5.58	6.40	6.44	7.45	wild type
374.96	0.206458	0.61243	0.214764	0.4837	0.475152	0.0334562
376.03	0.189125	0.624304	0.195877	0.507785	0.489742	0.00545583
376.93	0.221758	0.644596	0.24656	0.469983	0.526832	0.0176204
378	0.196686	0.693036	0.270435	0.416268	0.488327	0.0670271
379.06	0.261774	0.699614	0.266316	0.496435	0.506764	-0.0188125
379.96	0.221947	0.734861	0.31661	0.569316	0.532971	0.00802506
381.03	0.224361	0.732721	0.31687	0.531864	0.565677	-0.0218987
381.93	0.221482	0.753936	0.30406	0.60071	0.613091	-0.0222663
383	0.247463	0.739013	0.278096	0.525283	0.599622	0.046727
384.06	0.242732	0.758359	0.298643	0.493877	0.646409	-0.017898
384.96	0.265932	0.767662	0.342312	0.544416	0.66235	0.0531284
386.03	0.245289	0.784888	0.319589	0.548535	0.677244	0.0165032
386.93	0.281205	0.783963	0.32033	0.480622	0.718966	-0.0144857
388	0.287123	0.823365	0.334043	0.611295	0.669981	0.00402871
389.06	0.300385	0.834251	0.349142	0.575076	0.699642	0.0270145
389.96	0.328582	0.855141	0.333087	0.509693	0.713907	0.0255375
391.03	0.337102	0.857327	0.368034	0.640159	0.757945	0.014312
391.93	0.311415	0.866454	0.399899	0.671674	0.73931	0.0316812
393	0.305411	0.913402	0.38208	0.749916	0.714055	0.021613
394.06	0.340418	0.915833	0.395677	0.74251	0.76714	0.0220811
394.96	0.341498	0.917449	0.435979	0.62222	0.754927	0.00497376
396.03	0.37669	0.988838	0.387633	0.827715	0.807231	-0.0114938
396.93	0.394588	0.906451	0.407987	0.768974	0.843723	-0.00072469
398	0.406235	0.98051	0.408725	0.797972	0.820765	0.0594955
399.04	0.39926	0.971462	0.455223	0.821065	0.877393	0.0457808
399.94	0.385147	0.996339	0.469621	0.915686	0.841119	0.0686412
400.98	0.408456	0.977334	0.451363	0.787975	0.896728	-0.00656882
402.02	0.436727	0.987853	0.447557	0.896755	0.963885	0.0577979
403.07	0.394186	1.01953	0.449312	0.918083	0.953673	0.0303923
403.97	0.405157	1.02211	0.504284	0.81606	0.951782	0.0362851
405.01	0.4387	1.00705	0.46111	0.911683	0.948832	0.0462679
406.05	0.419275	1.01135	0.40066	0.938697	0.97613	0.0387138
406.95	0.388995	0.999579	0.459948	0.864271	0.941685	0.00548291
408	0.446187	1.03587	0.426096	1.00851	0.972324	0.00319908
409.06	0.435523	0.989208	0.445465	0.920983	0.925333	-0.0137637
409.96	0.419526	1.01288	0.436668	0.945349	1.03207	-0.029728
411.03	0.431678	1.00424	0.457526	1.04746	1.00109	0.0251688
411.93	0.447317	1.01296	0.416595	0.950453	1.03567	-0.0179216
413	0.396755	1.03935	0.43703	0.976499	1.02365	0.0285438
414.06	0.377002	0.981279	0.422244	0.976059	1.02882	-0.00289506
414.96	0.426838	1.00696	0.449922	1.00576	1.0112	-0.0203995
416.03	0.426487	0.967621	0.416749	1.00656	1.00735	0.0202794
416.93	0.419001	0.987352	0.400566	1.0437	1.07064	-0.0248173
418	0.439755	0.942334	0.441525	1.00402	0.993078	-0.0159843
419.04	0.416996	0.959541	0.422412	1.00805	1.06452	0.0410228
419.94	0.427641	0.942708	0.416744	0.961089	1.04872	0.0180571
420.98	0.412783	0.961214	0.382667	1.0462	1.00952	0.00884615
422.02	0.390958	0.924206	0.408681	1.05447	0.994074	0.00399615
423.07	0.436169	0.918422	0.511766	0.934971	1.0247	0.0360529
423.97	0.429481	0.907391	0.436074	0.799008	1.02629	0.0342698
425.01	0.409855	0.902911	0.457032	0.964625	1.03368	-0.0189593
426.05	0.462905	0.916442	0.465572	0.848855	1.01118	0.0111163
426.95	0.393656	0.880465	0.430111	1.00445	0.962778	0.0265068
428	0.424364	0.86878	0.453147	0.855212	0.986275	-0.00864502
429.06	0.453368	0.869823	0.4157	0.980293	0.938419	0.0490779
429.96	0.475872	0.879089	0.432797	0.918023	1.02005	0.0313639
431.03	0.450023	0.879767	0.447874	0.892674	1.03613	0.00746893
431.93	0.450695	0.867754	0.391561	0.898568	0.996028	0.00813822
433	0.465892	0.861169	0.468393	0.783257	0.94312	0.0768391
434.06	0.474056	0.809527	0.478977	0.930609	0.921777	0.00437925
434.96	0.45685	0.829951	0.430117	0.806598	0.925337	0.0123504
436.03	0.5022	0.830727	0.481892	0.852814	0.911591	0.0254285
436.93	0.5006	0.836326	0.437769	0.929115	0.929186	-0.0248597
438	0.496475	0.81374	0.509807	0.841561	0.896897	0.0245541
439.04	0.494727	0.813672	0.485976	0.840097	0.991066	-0.00421499
439.94	0.50661	0.801974	0.500409	0.910718	0.877472	-0.0211511
440.98	0.533466	0.795378	0.516819	0.766029	0.911077	-0.00225864
442.02	0.541549	0.796759	0.480021	0.864239	0.870053	0.079198
443.07	0.528184	0.804813	0.517316	0.958255	0.816462	0.00146277
443.97	0.538275	0.808354	0.550539	0.866082	0.989329	-0.00879815
445.01	0.535449	0.803909	0.551098	0.8541	0.904755	0.0462937
446.05	0.588996	0.833222	0.561209	0.793331	0.920943	-0.00338981
446.95	0.592241	0.77228	0.609371	0.855743	0.920177	0.0567872
448	0.573613	0.754365	0.567948	0.842223	0.915963	0.0187276
449.04	0.630155	0.793436	0.631113	0.866757	0.837534	-0.00661148
449.94	0.627106	0.795179	0.58915	0.948648	0.853216	-0.0338627
450.98	0.612874	0.790328	0.59677	0.894912	0.869798	-0.0132098
452.02	0.61796	0.819071	0.627837	0.994726	0.906154	0.0346115
453.07	0.639251	0.806518	0.592732	0.87708	0.852899	0.0233605
453.97	0.661232	0.79538	0.618928	0.790076	0.842718	0.0097233
455.01	0.674492	0.822002	0.63353	0.854824	0.876068	0.046861
456.05	0.690518	0.800159	0.67548	1.00257	0.789152	0.0195008
456.95	0.679047	0.79089	0.689295	0.9779	0.912422	0.0343502
458	0.682679	0.800571	0.617531	0.922899	0.883596	0.0351775
459.02	0.700188	0.774561	0.673302	1.00876	0.868353	0.0186468
460.05	0.725957	0.784117	0.711421	0.976673	0.811048	0.0222519
460.94	0.748895	0.792362	0.654946	0.921213	0.870605	0.00311499
461.97	0.753988	0.814911	0.741803	0.980666	0.931432	0.0703349
463	0.735492	0.784531	0.753269	0.856385	0.856353	0.0351647
464.02	0.743178	0.772422	0.738951	0.893326	0.827804	0.0217123
465.05	0.787256	0.798944	0.787981	0.814036	0.881227	-0.0186126
465.94	0.803054	0.805305	0.750873	1.00965	0.859198	0.0217995
466.97	0.805287	0.780252	0.797738	0.985764	0.845175	0.0254118
468	0.768548	0.812018	0.821638	0.975881	0.837351	-0.000355774
469.04	0.848039	0.79019	0.816135	1.013	0.759503	-0.0011896
469.94	0.867	0.845362	0.826965	0.949125	0.884894	0.0621294
470.98	0.853257	0.784203	0.832604	0.972584	0.840703	0.0129257
472.02	0.849128	0.817239	0.805203	0.958332	0.831791	-0.0177478
473.07	0.867555	0.771466	0.837385	1.00624	0.795981	0.0649959
473.97	0.870907	0.793625	0.885681	0.910024	0.812842	0.0483263
475.01	0.883682	0.840201	0.878033	0.939297	0.76309	0.00559216
476.05	0.904714	0.770884	0.886557	1.01181	0.80422	0.000449628
476.95	0.866396	0.79862	0.901022	0.846138	0.821393	0.0460713
478	0.92904	0.780092	0.937087	0.936481	0.834384	0.0457821
479.02	0.925708	0.795502	0.911261	1.05506	0.803039	0.0134483
480.05	0.895453	0.76716	0.940582	1.00846	0.79289	0.0327458
480.94	0.951859	0.743746	0.937934	1.00385	0.800458	0.0312627
481.97	0.977799	0.781263	0.98181	1.02373	0.801001	0.0498276
483	0.955425	0.80812	0.932882	1.02524	0.749697	0.0156584
484.02	0.999172	0.816023	0.964944	0.969391	0.737207	0.0796877
485.05	0.958682	0.74805	0.98797	1.08799	0.716094	-0.00663562
485.94	0.965451	0.775289	0.966313	0.996309	0.762151	-0.0331994
486.97	0.985721	0.740357	1.02727	1.1146	0.75606	0.0559522
488	0.991608	0.745753	0.951631	1.03109	0.720347	0.0514769
489.04	0.998051	0.737086	0.998639	0.908505	0.696545	0.0395259
489.94	0.955809	0.712937	1.04625	1.06134	0.631278	0.040049
490.98	0.965011	0.737067	0.992179	1.07708	0.668617	-0.0179168
492.02	1.01083	0.718189	0.982645	0.939378	0.659286	0.0427245
493.07	0.970481	0.706121	1.01678	0.939215	0.699624	0.0159334
493.97	1.04288	0.721414	0.996294	0.946127	0.704099	-0.000873591
495.01	0.970619	0.694637	1.01158	0.937195	0.698596	0.0472416
496.05	0.983876	0.722146	0.999125	1.03044	0.665025	0.0376709
496.95	0.983487	0.705029	0.981694	0.957756	0.655933	0.0253425
498	0.970808	0.687004	0.983528	0.830341	0.630672	0.0454009
499.02	0.992207	0.706668	0.992785	0.920704	0.598622	-0.0457031
500.05	0.986708	0.654449	1.00417	0.922905	0.63866	0.0274052
500.94	0.963179	0.655465	1.00019	0.945611	0.593132	0.000375762
501.97	0.960478	0.622605	1.03911	1.00766	0.6301	0.0297899
503	0.939666	0.654238	0.976425	0.873028	0.59778	-0.00914812
504.02	0.95253	0.647821	0.941076	0.943919	0.578161	0.00964865
505.05	0.940633	0.665708	0.933378	0.933143	0.581348	0.0318244
505.94	0.943615	0.615921	0.946296	0.915871	0.556011	0.0338679
506.97	0.927521	0.641572	0.913068	0.789401	0.508412	0.027929
508	0.904238	0.592896	0.930545	0.826273	0.523624	0.0507442
509.02	0.920671	0.53691	0.91184	0.723342	0.541964	0.023561
510.05	0.869436	0.613757	0.886545	0.870588	0.532512	0.0528401
510.94	0.833752	0.551785	0.848781	0.692282	0.430484	0.0266038
511.97	0.829559	0.565595	0.896385	0.84718	0.517193	0.0120947
513	0.875634	0.559616	0.877458	0.760484	0.501953	0.0143591
514.02	0.819157	0.51597	0.897849	0.803306	0.478103	-0.00929338
515.05	0.831127	0.516207	0.901468	0.825707	0.469543	0.0381554
515.94	0.84999	0.528007	0.867908	0.723967	0.452899	0.00867779
516.97	0.849818	0.518872	0.829238	0.738605	0.46222	-0.0202314
518	0.812898	0.510964	0.798235	0.689104	0.452682	0.0159031
519.02	0.754034	0.501141	0.863077	0.735632	0.484288	0.0177025
520.05	0.754016	0.539138	0.789069	0.642441	0.455932	0.00894338
520.94	0.790311	0.498523	0.782767	0.653617	0.409397	-0.00244032
521.97	0.693806	0.453016	0.771297	0.705643	0.393545	0.0334451
523	0.767114	0.451597	0.741257	0.705538	0.390993	-0.00108755
524.02	0.723289	0.446648	0.717328	0.672927	0.413218	0.0271526
525.05	0.69725	0.479641	0.758866	0.622093	0.397248	-0.00230652
525.94	0.699719	0.432945	0.715539	0.588662	0.414453	0.0727398
526.97	0.658047	0.499816	0.709247	0.57437	0.355561	0.00772017
528	0.648529	0.424636	0.684357	0.578859	0.405915	0.021895
529.01	0.67545	0.417944	0.653893	0.713875	0.347902	0.0803019
530.02	0.655433	0.415625	0.6738	0.516789	0.337085	0.0673127
531.04	0.623875	0.384347	0.656112	0.592991	0.354851	0.00347868
532.05	0.597391	0.391396	0.62925	0.6058	0.31372	-0.0469657
533.07	0.635754	0.411485	0.66649	0.627043	0.319097	0.00557218
533.94	0.589489	0.379037	0.632391	0.456836	0.347181	0.000473374
534.95	0.57559	0.400021	0.654596	0.554269	0.343362	0.0247437
535.97	0.535472	0.368137	0.546951	0.51496	0.310339	-0.0184608
536.98	0.584156	0.357016	0.569297	0.561998	0.347178	0.00795053
538	0.551307	0.354521	0.568582	0.496187	0.314486	0.0584549
539.02	0.563418	0.351432	0.535192	0.493314	0.274384	-0.0110783
540.05	0.55486	0.39179	0.546534	0.489572	0.26946	-0.0259823
540.94	0.509726	0.345508	0.560632	0.468583	0.288536	-0.0306012
541.97	0.551009	0.342472	0.541521	0.403371	0.335083	0.0289043
543	0.487197	0.323761	0.503964	0.42107	0.27254	0.0746625
544.02	0.501823	0.340914	0.498098	0.523213	0.246763	0.0143933
545.05	0.488816	0.323367	0.476734	0.473357	0.245737	0.0188723
545.94	0.517725	0.332712	0.494503	0.384719	0.239015	0.0426071
546.97	0.491791	0.298771	0.466365	0.470923	0.255938	-0.0118726
548	0.446412	0.300604	0.470257	0.414682	0.222053	0.0143781
549.01	0.467792	0.272939	0.51299	0.496856	0.232845	-0.00353875
550.02	0.463509	0.259799	0.440542	0.275529	0.237105	0.00400676
551.04	0.423119	0.280176	0.462104	0.307695	0.27326	0.0269745
552.05	0.403214	0.260544	0.478361	0.374815	0.245969	-0.0029198
553.07	0.444422	0.262881	0.427317	0.303825	0.272573	0.0729747
553.94	0.38666	0.289196	0.397278	0.26214	0.206603	0.00280739
554.95	0.416949	0.276154	0.397192	0.396802	0.242064	0.0328476
555.97	0.414519	0.242693	0.38428	0.359915	0.24706	-0.0503124
556.98	0.405117	0.234483	0.401976	0.394922	0.173359	0.0651755
558	0.389753	0.262093	0.42958	0.352418	0.231799	0.0402983
559.01	0.428449	0.285309	0.381192	0.322529	0.209075	0.0257314
560.02	0.364039	0.245543	0.399447	0.296367	0.248514	0.0152385
561.04	0.327236	0.244412	0.410981	0.456303	0.194163	0.0193089
562.05	0.355217	0.219872	0.352972	0.238375	0.196007	0.0360744
563.07	0.32958	0.237642	0.338286	0.325544	0.224087	-0.011707
563.94	0.338012	0.241017	0.361809	0.30264	0.220827	-0.0449794
564.95	0.335732	0.220252	0.352368	0.269362	0.186765	0.0233684
565.97	0.341311	0.20231	0.319977	0.301416	0.162106	0.0180828
566.98	0.314582	0.24667	0.32157	0.328589	0.220983	-0.00182104
568	0.300533	0.205558	0.33686	0.231109	0.213353	-0.0246857
569.01	0.279625	0.265234	0.28777	0.305352	0.134269	0.0243001
570.02	0.305645	0.183091	0.279702	0.360567	0.187013	0.0510266
571.04	0.304962	0.262155	0.305663	0.227809	0.187185	-0.0156416
572.05	0.279206	0.210161	0.324602	0.258032	0.150515	0.0417012
573.07	0.300407	0.204887	0.278054	0.237564	0.164566	-0.00229681
573.94	0.291896	0.194298	0.294495	0.253469	0.228627	0.0782428
574.95	0.27962	0.170647	0.278849	0.295672	0.173344	0.0173881
575.97	0.245218	0.180854	0.256087	0.275871	0.193423	0.00296554
576.97	0.224993	0.216936	0.27843	0.238175	0.162339	-0.00323937
578	0.258226	0.220628	0.275854	0.224192	0.124862	0.0690518
579.02	0.241653	0.191118	0.241219	0.214111	0.204367	0.0251342
580.05	0.237818	0.212906	0.230158	0.159679	0.112296	-0.0150358
580.94	0.265664	0.178991	0.230169	0.223873	0.175591	-0.00291149
581.97	0.250015	0.190033	0.22991	0.200314	0.153492	0.0363256
583	0.24352	0.161041	0.24118	0.128941	0.177731	0.0302876
584.02	0.262633	0.16022	0.213288	0.250898	0.0925833	-0.00776108
585.05	0.215209	0.155179	0.164072	0.249937	0.143778	0.0541771
585.94	0.227788	0.161683	0.271065	0.149536	0.150073	0.042648
586.97	0.217118	0.152361	0.225639	0.168431	0.159363	0.0368434
588	0.220058	0.18813	0.218203	0.238529	0.132146	0.0656062
589.01	0.199744	0.107469	0.209247	0.305573	0.161277	0.0263632
590.02	0.209977	0.147523	0.200523	0.258902	0.171273	0.0686526
591.04	0.225608	0.132851	0.168905	0.187246	0.121721	0.0609354
592.05	0.188273	0.14087	0.230774	0.0591587	0.163471	0.0394732
593.07	0.171688	0.154447	0.232236	0.246232	0.141249	0.00463327
593.94	0.225078	0.143604	0.213308	0.195656	0.0699293	0.0315697
594.95	0.209368	0.11458	0.210117	0.222669	0.168092	0.0137771
595.97	0.200447	0.129138	0.17595	0.242265	0.0868052	-0.0505755
596.98	0.165213	0.15296	0.195029	0.257701	0.152148	0.0704146
598	0.178659	0.126445	0.189865	0.177864	0.0430022	-0.0228654
599.02	0.23101	0.116241	0.202393	0.19664	0.102192	0.00347667
600.05	0.186368	0.121773	0.240352	0.160814	0.117023	-0.00564652
