# Supplementary material for: Concerted conformational dynamics and water movements in the ghrelin G protein-coupled receptor
Source: eLife. 2021 Sep 3;10:e63201. doi: 10.7554/eLife.63201 (PMC8416020; doi:10.7554/eLife.63201)
Supplement: Figure 2—figure supplement 1—source data 1. [file elife-63201-fig2-figsupp1-data1.xlsx]

## Sheet: figure 2 S1
wavelength (nm)	3.43	5.58	6.40	6.44	7.45
374.96	0.206458	0.61243	0.214764	0.4837	0.475152
376.03	0.189125	0.624304	0.195877	0.507785	0.489742
376.93	0.221758	0.644596	0.24656	0.469983	0.526832
378	0.196686	0.693036	0.270435	0.416268	0.488327
379.06	0.261774	0.699614	0.266316	0.496435	0.506764
379.96	0.221947	0.734861	0.31661	0.569316	0.532971
381.03	0.224361	0.732721	0.31687	0.531864	0.565677
381.93	0.221482	0.753936	0.30406	0.60071	0.613091
383	0.247463	0.739013	0.278096	0.525283	0.599622
384.06	0.242732	0.758359	0.298643	0.493877	0.646409
384.96	0.265932	0.767662	0.342312	0.544416	0.66235
386.03	0.245289	0.784888	0.319589	0.548535	0.677244
386.93	0.281205	0.783963	0.32033	0.480622	0.718966
388	0.287123	0.823365	0.334043	0.611295	0.669981
389.06	0.300385	0.834251	0.349142	0.575076	0.699642
389.96	0.328582	0.855141	0.333087	0.509693	0.713907
391.03	0.337102	0.857327	0.368034	0.640159	0.757945
391.93	0.311415	0.866454	0.399899	0.671674	0.73931
393	0.305411	0.913402	0.38208	0.749916	0.714055
394.06	0.340418	0.915833	0.395677	0.74251	0.76714
394.96	0.341498	0.917449	0.435979	0.62222	0.754927
396.03	0.37669	0.988838	0.387633	0.827715	0.807231
396.93	0.394588	0.906451	0.407987	0.768974	0.843723
398	0.406235	0.98051	0.408725	0.797972	0.820765
399.04	0.39926	0.971462	0.455223	0.821065	0.877393
399.94	0.385147	0.996339	0.469621	0.915686	0.841119
400.98	0.408456	0.977334	0.451363	0.787975	0.896728
402.02	0.436727	0.987853	0.447557	0.896755	0.963885
403.07	0.394186	1.01953	0.449312	0.918083	0.953673
403.97	0.405157	1.02211	0.504284	0.81606	0.951782
405.01	0.4387	1.00705	0.46111	0.911683	0.948832
406.05	0.419275	1.01135	0.40066	0.938697	0.97613
406.95	0.388995	0.999579	0.459948	0.864271	0.941685
408	0.446187	1.03587	0.426096	1.00851	0.972324
409.06	0.435523	0.989208	0.445465	0.920983	0.925333
409.96	0.419526	1.01288	0.436668	0.945349	1.03207
411.03	0.431678	1.00424	0.457526	1.04746	1.00109
411.93	0.447317	1.01296	0.416595	0.950453	1.03567
413	0.396755	1.03935	0.43703	0.976499	1.02365
414.06	0.377002	0.981279	0.422244	0.976059	1.02882
414.96	0.426838	1.00696	0.449922	1.00576	1.0112
416.03	0.426487	0.967621	0.416749	1.00656	1.00735
416.93	0.419001	0.987352	0.400566	1.0437	1.07064
418	0.439755	0.942334	0.441525	1.00402	0.993078
419.04	0.416996	0.959541	0.422412	1.00805	1.06452
419.94	0.427641	0.942708	0.416744	0.961089	1.04872
420.98	0.412783	0.961214	0.382667	1.0462	1.00952
422.02	0.390958	0.924206	0.408681	1.05447	0.994074
423.07	0.436169	0.918422	0.511766	0.934971	1.0247
423.97	0.429481	0.907391	0.436074	0.799008	1.02629
425.01	0.409855	0.902911	0.457032	0.964625	1.03368
426.05	0.462905	0.916442	0.465572	0.848855	1.01118
426.95	0.393656	0.880465	0.430111	1.00445	0.962778
428	0.424364	0.86878	0.453147	0.855212	0.986275
429.06	0.453368	0.869823	0.4157	0.980293	0.938419
429.96	0.475872	0.879089	0.432797	0.918023	1.02005
431.03	0.450023	0.879767	0.447874	0.892674	1.03613
431.93	0.450695	0.867754	0.391561	0.898568	0.996028
433	0.465892	0.861169	0.468393	0.783257	0.94312
434.06	0.474056	0.809527	0.478977	0.930609	0.921777
434.96	0.45685	0.829951	0.430117	0.806598	0.925337
436.03	0.5022	0.830727	0.481892	0.852814	0.911591
436.93	0.5006	0.836326	0.437769	0.929115	0.929186
438	0.496475	0.81374	0.509807	0.841561	0.896897
439.04	0.494727	0.813672	0.485976	0.840097	0.991066
439.94	0.50661	0.801974	0.500409	0.910718	0.877472
440.98	0.533466	0.795378	0.516819	0.766029	0.911077
442.02	0.541549	0.796759	0.480021	0.864239	0.870053
443.07	0.528184	0.804813	0.517316	0.958255	0.816462
443.97	0.538275	0.808354	0.550539	0.866082	0.989329
445.01	0.535449	0.803909	0.551098	0.8541	0.904755
446.05	0.588996	0.833222	0.561209	0.793331	0.920943
446.95	0.592241	0.77228	0.609371	0.855743	0.920177
448	0.573613	0.754365	0.567948	0.842223	0.915963
449.04	0.630155	0.793436	0.631113	0.866757	0.837534
449.94	0.627106	0.795179	0.58915	0.948648	0.853216
450.98	0.612874	0.790328	0.59677	0.894912	0.869798
452.02	0.61796	0.819071	0.627837	0.994726	0.906154
453.07	0.639251	0.806518	0.592732	0.87708	0.852899
453.97	0.661232	0.79538	0.618928	0.790076	0.842718
455.01	0.674492	0.822002	0.63353	0.854824	0.876068
456.05	0.690518	0.800159	0.67548	1.00257	0.789152
456.95	0.679047	0.79089	0.689295	0.9779	0.912422
458	0.682679	0.800571	0.617531	0.922899	0.883596
459.02	0.700188	0.774561	0.673302	1.00876	0.868353
460.05	0.725957	0.784117	0.711421	0.976673	0.811048
460.94	0.748895	0.792362	0.654946	0.921213	0.870605
461.97	0.753988	0.814911	0.741803	0.980666	0.931432
463	0.735492	0.784531	0.753269	0.856385	0.856353
464.02	0.743178	0.772422	0.738951	0.893326	0.827804
465.05	0.787256	0.798944	0.787981	0.814036	0.881227
465.94	0.803054	0.805305	0.750873	1.00965	0.859198
466.97	0.805287	0.780252	0.797738	0.985764	0.845175
468	0.768548	0.812018	0.821638	0.975881	0.837351
469.04	0.848039	0.79019	0.816135	1.013	0.759503
469.94	0.867	0.845362	0.826965	0.949125	0.884894
470.98	0.853257	0.784203	0.832604	0.972584	0.840703
472.02	0.849128	0.817239	0.805203	0.958332	0.831791
473.07	0.867555	0.771466	0.837385	1.00624	0.795981
473.97	0.870907	0.793625	0.885681	0.910024	0.812842
475.01	0.883682	0.840201	0.878033	0.939297	0.76309
476.05	0.904714	0.770884	0.886557	1.01181	0.80422
476.95	0.866396	0.79862	0.901022	0.846138	0.821393
478	0.92904	0.780092	0.937087	0.936481	0.834384
479.02	0.925708	0.795502	0.911261	1.05506	0.803039
480.05	0.895453	0.76716	0.940582	1.00846	0.79289
480.94	0.951859	0.743746	0.937934	1.00385	0.800458
481.97	0.977799	0.781263	0.98181	1.02373	0.801001
483	0.955425	0.80812	0.932882	1.02524	0.749697
484.02	0.999172	0.816023	0.964944	0.969391	0.737207
485.05	0.958682	0.74805	0.98797	1.08799	0.716094
485.94	0.965451	0.775289	0.966313	0.996309	0.762151
486.97	0.985721	0.740357	1.02727	1.1146	0.75606
488	0.991608	0.745753	0.951631	1.03109	0.720347
489.04	0.998051	0.737086	0.998639	0.908505	0.696545
489.94	0.955809	0.712937	1.04625	1.06134	0.631278
490.98	0.965011	0.737067	0.992179	1.07708	0.668617
492.02	1.01083	0.718189	0.982645	0.939378	0.659286
493.07	0.970481	0.706121	1.01678	0.939215	0.699624
493.97	1.04288	0.721414	0.996294	0.946127	0.704099
495.01	0.970619	0.694637	1.01158	0.937195	0.698596
496.05	0.983876	0.722146	0.999125	1.03044	0.665025
496.95	0.983487	0.705029	0.981694	0.957756	0.655933
498	0.970808	0.687004	0.983528	0.830341	0.630672
499.02	0.992207	0.706668	0.992785	0.920704	0.598622
500.05	0.986708	0.654449	1.00417	0.922905	0.63866
500.94	0.963179	0.655465	1.00019	0.945611	0.593132
501.97	0.960478	0.622605	1.03911	1.00766	0.6301
503	0.939666	0.654238	0.976425	0.873028	0.59778
504.02	0.95253	0.647821	0.941076	0.943919	0.578161
505.05	0.940633	0.665708	0.933378	0.933143	0.581348
505.94	0.943615	0.615921	0.946296	0.915871	0.556011
506.97	0.927521	0.641572	0.913068	0.789401	0.508412
508	0.904238	0.592896	0.930545	0.826273	0.523624
509.02	0.920671	0.53691	0.91184	0.723342	0.541964
510.05	0.869436	0.613757	0.886545	0.870588	0.532512
510.94	0.833752	0.551785	0.848781	0.692282	0.430484
511.97	0.829559	0.565595	0.896385	0.84718	0.517193
513	0.875634	0.559616	0.877458	0.760484	0.501953
514.02	0.819157	0.51597	0.897849	0.803306	0.478103
515.05	0.831127	0.516207	0.901468	0.825707	0.469543
515.94	0.84999	0.528007	0.867908	0.723967	0.452899
516.97	0.849818	0.518872	0.829238	0.738605	0.46222
518	0.812898	0.510964	0.798235	0.689104	0.452682
519.02	0.754034	0.501141	0.863077	0.735632	0.484288
520.05	0.754016	0.539138	0.789069	0.642441	0.455932
520.94	0.790311	0.498523	0.782767	0.653617	0.409397
521.97	0.693806	0.453016	0.771297	0.705643	0.393545
523	0.767114	0.451597	0.741257	0.705538	0.390993
524.02	0.723289	0.446648	0.717328	0.672927	0.413218
525.05	0.69725	0.479641	0.758866	0.622093	0.397248
525.94	0.699719	0.432945	0.715539	0.588662	0.414453
526.97	0.658047	0.499816	0.709247	0.57437	0.355561
528	0.648529	0.424636	0.684357	0.578859	0.405915
529.01	0.67545	0.417944	0.653893	0.713875	0.347902
530.02	0.655433	0.415625	0.6738	0.516789	0.337085
531.04	0.623875	0.384347	0.656112	0.592991	0.354851
532.05	0.597391	0.391396	0.62925	0.6058	0.31372
533.07	0.635754	0.411485	0.66649	0.627043	0.319097
533.94	0.589489	0.379037	0.632391	0.456836	0.347181
534.95	0.57559	0.400021	0.654596	0.554269	0.343362
535.97	0.535472	0.368137	0.546951	0.51496	0.310339
536.98	0.584156	0.357016	0.569297	0.561998	0.347178
538	0.551307	0.354521	0.568582	0.496187	0.314486
539.02	0.563418	0.351432	0.535192	0.493314	0.274384
540.05	0.55486	0.39179	0.546534	0.489572	0.26946
540.94	0.509726	0.345508	0.560632	0.468583	0.288536
541.97	0.551009	0.342472	0.541521	0.403371	0.335083
543	0.487197	0.323761	0.503964	0.42107	0.27254
544.02	0.501823	0.340914	0.498098	0.523213	0.246763
545.05	0.488816	0.323367	0.476734	0.473357	0.245737
545.94	0.517725	0.332712	0.494503	0.384719	0.239015
546.97	0.491791	0.298771	0.466365	0.470923	0.255938
548	0.446412	0.300604	0.470257	0.414682	0.222053
549.01	0.467792	0.272939	0.51299	0.496856	0.232845
550.02	0.463509	0.259799	0.440542	0.275529	0.237105
551.04	0.423119	0.280176	0.462104	0.307695	0.27326
552.05	0.403214	0.260544	0.478361	0.374815	0.245969
553.07	0.444422	0.262881	0.427317	0.303825	0.272573
553.94	0.38666	0.289196	0.397278	0.26214	0.206603
554.95	0.416949	0.276154	0.397192	0.396802	0.242064
555.97	0.414519	0.242693	0.38428	0.359915	0.24706
556.98	0.405117	0.234483	0.401976	0.394922	0.173359
558	0.389753	0.262093	0.42958	0.352418	0.231799
559.01	0.428449	0.285309	0.381192	0.322529	0.209075
560.02	0.364039	0.245543	0.399447	0.296367	0.248514
561.04	0.327236	0.244412	0.410981	0.456303	0.194163
562.05	0.355217	0.219872	0.352972	0.238375	0.196007
563.07	0.32958	0.237642	0.338286	0.325544	0.224087
563.94	0.338012	0.241017	0.361809	0.30264	0.220827
564.95	0.335732	0.220252	0.352368	0.269362	0.186765
565.97	0.341311	0.20231	0.319977	0.301416	0.162106
566.98	0.314582	0.24667	0.32157	0.328589	0.220983
568	0.300533	0.205558	0.33686	0.231109	0.213353
569.01	0.279625	0.265234	0.28777	0.305352	0.134269
570.02	0.305645	0.183091	0.279702	0.360567	0.187013
571.04	0.304962	0.262155	0.305663	0.227809	0.187185
572.05	0.279206	0.210161	0.324602	0.258032	0.150515
573.07	0.300407	0.204887	0.278054	0.237564	0.164566
573.94	0.291896	0.194298	0.294495	0.253469	0.228627
574.95	0.27962	0.170647	0.278849	0.295672	0.173344
575.97	0.245218	0.180854	0.256087	0.275871	0.193423
576.97	0.224993	0.216936	0.27843	0.238175	0.162339
578	0.258226	0.220628	0.275854	0.224192	0.124862
579.02	0.241653	0.191118	0.241219	0.214111	0.204367
580.05	0.237818	0.212906	0.230158	0.159679	0.112296
580.94	0.265664	0.178991	0.230169	0.223873	0.175591
581.97	0.250015	0.190033	0.22991	0.200314	0.153492
583	0.24352	0.161041	0.24118	0.128941	0.177731
584.02	0.262633	0.16022	0.213288	0.250898	0.0925833
585.05	0.215209	0.155179	0.164072	0.249937	0.143778
585.94	0.227788	0.161683	0.271065	0.149536	0.150073
586.97	0.217118	0.152361	0.225639	0.168431	0.159363
588	0.220058	0.18813	0.218203	0.238529	0.132146
589.01	0.199744	0.107469	0.209247	0.305573	0.161277
590.02	0.209977	0.147523	0.200523	0.258902	0.171273
591.04	0.225608	0.132851	0.168905	0.187246	0.121721
592.05	0.188273	0.14087	0.230774	0.0591587	0.163471
593.07	0.171688	0.154447	0.232236	0.246232	0.141249
593.94	0.225078	0.143604	0.213308	0.195656	0.0699293
594.95	0.209368	0.11458	0.210117	0.222669	0.168092
595.97	0.200447	0.129138	0.17595	0.242265	0.0868052
596.98	0.165213	0.15296	0.195029	0.257701	0.152148
598	0.178659	0.126445	0.189865	0.177864	0.0430022
599.02	0.23101	0.116241	0.202393	0.19664	0.102192
600.05	0.186368	0.121773	0.240352	0.160814	0.117023
