# Supplementary material for: Concerted conformational dynamics and water movements in the ghrelin G protein-coupled receptor
Source: eLife. 2021 Sep 3;10:e63201. doi: 10.7554/eLife.63201 (PMC8416020; doi:10.7554/eLife.63201)
Supplement: Figure 2—figure supplement 5—source data 1. [file elife-63201-fig2-figsupp5-data1.xlsx]

## Sheet: fig2 S5
wavelength (nm)	apo	JMV3011	ghrelin	JMV3002	SPA	ghrelin_PIP2
374.96	0.61243	0.58047	0.389026	0.639691	0.692962	0.262947
376.03	0.624304	0.465834	0.31466	0.669672	0.69171	0.263473
376.93	0.644596	0.588647	0.356127	0.69002	0.742086	0.272889
378	0.693036	0.614194	0.300459	0.708907	0.785015	0.287697
379.06	0.699614	0.611435	0.346904	0.773548	0.757993	0.305844
379.96	0.734861	0.716506	0.3162	0.727883	0.76372	0.273866
381.03	0.732721	0.611476	0.344271	0.770818	0.752349	0.291469
381.93	0.753936	0.693875	0.380725	0.801579	0.766647	0.298884
383	0.739013	0.746212	0.37318	0.805443	0.804478	0.357957
384.06	0.758359	0.659098	0.377928	0.807578	0.823088	0.333576
384.96	0.767662	0.758644	0.38056	0.830215	0.844152	0.301501
386.03	0.784888	0.747051	0.35277	0.859736	0.859413	0.33385
386.93	0.783963	0.779052	0.42565	0.881318	0.842091	0.392657
388	0.823365	0.781439	0.428239	0.899453	0.890895	0.381456
389.06	0.834251	0.790424	0.461709	0.834889	0.86297	0.423856
389.96	0.855141	0.900268	0.420953	0.935191	0.891904	0.415442
391.03	0.857327	0.746167	0.481971	0.923274	0.860833	0.412012
391.93	0.866454	0.840204	0.511832	0.931979	0.927634	0.436312
393	0.913402	0.864708	0.442795	0.956864	0.918407	0.424089
394.06	0.915833	0.971568	0.491412	0.929934	0.934481	0.399657
394.96	0.917449	0.79863	0.535145	0.973805	0.951032	0.431808
396.03	0.988838	0.910877	0.481581	1.00005	0.933076	0.49373
396.93	0.906451	0.908084	0.503184	1.00586	0.93362	0.433068
398	0.98051	0.964502	0.489942	0.982076	0.958469	0.411552
399.04	0.971462	1.00553	0.554002	1.04994	0.972793	0.381315
399.94	0.996339	0.993217	0.572191	1.01768	0.964479	0.436265
400.98	0.977334	0.999661	0.576979	1.02949	0.98812	0.433058
402.02	0.987853	0.990512	0.561366	0.99312	0.988599	0.403871
403.07	1.01953	0.934543	0.525501	0.997542	0.996724	0.423896
403.97	1.02211	1.05215	0.580355	1.07926	1.00162	0.479643
405.01	1.00705	1.04769	0.594401	1.03055	1.01579	0.439605
406.05	1.01135	1.02113	0.608661	1.06738	0.975083	0.43228
406.95	0.999579	0.899699	0.617059	1.00136	0.992884	0.455632
408	1.03587	1.00514	0.594875	1.03098	1.0126	0.434005
409.06	0.989208	1.05237	0.628941	1.01674	0.997652	0.403165
409.96	1.01288	1.04303	0.581866	1.00255	1.02038	0.413164
411.03	1.00424	1.03846	0.618115	1.03273	1.04004	0.459283
411.93	1.01296	0.991979	0.661177	1.02779	0.984484	0.416298
413	1.03935	1.05706	0.605665	1.00605	0.968163	0.463845
414.06	0.981279	0.996583	0.694886	1.00619	0.981492	0.419756
414.96	1.00696	0.984191	0.577528	1.0098	1.02876	0.469594
416.03	0.967621	0.967572	0.631155	0.973281	0.955581	0.501077
416.93	0.987352	0.878715	0.644332	0.945003	1.0472	0.486261
418	0.942334	0.974436	0.612211	0.939288	0.982695	0.53015
419.04	0.959541	0.947979	0.653689	0.956516	0.929636	0.553212
419.94	0.942708	1.0008	0.605037	0.966552	0.978775	0.495711
420.98	0.961214	0.936101	0.609873	0.945279	0.953883	0.502985
422.02	0.924206	0.980702	0.630186	0.908992	0.970961	0.549775
423.07	0.918422	0.852178	0.636302	0.945655	0.968963	0.571099
423.97	0.907391	0.942013	0.751029	0.924554	0.946939	0.558727
425.01	0.902911	0.89181	0.704744	0.909708	0.968741	0.56457
426.05	0.916442	0.887453	0.750887	0.900294	0.925311	0.586667
426.95	0.880465	0.895173	0.747357	0.841547	0.923171	0.564318
428	0.86878	0.884746	0.76495	0.858487	0.89168	0.605336
429.06	0.869823	0.867483	0.72021	0.874234	0.906831	0.619424
429.96	0.879089	0.766038	0.708335	0.904185	0.891788	0.617546
431.03	0.879767	0.839879	0.799222	0.876683	0.866076	0.618655
431.93	0.867754	0.855853	0.793058	0.8634	0.890532	0.606543
433	0.861169	0.887224	0.779612	0.823303	0.877737	0.66635
434.06	0.809527	0.827731	0.775357	0.833972	0.852725	0.681146
434.96	0.829951	0.834713	0.838701	0.780215	0.90178	0.706596
436.03	0.830727	0.779659	0.745387	0.840318	0.849517	0.69392
436.93	0.836326	0.770222	0.80307	0.840551	0.898455	0.717732
438	0.81374	0.775281	0.804033	0.809501	0.831353	0.73783
439.04	0.813672	0.845281	0.840335	0.806381	0.796089	0.788868
439.94	0.801974	0.790419	0.83542	0.809144	0.820708	0.713885
440.98	0.795378	0.750587	0.884547	0.867093	0.767592	0.722241
442.02	0.796759	0.77139	0.918005	0.828476	0.793953	0.740949
443.07	0.804813	0.703993	0.87035	0.810599	0.761554	0.790982
443.97	0.808354	0.691001	0.809214	0.849291	0.792866	0.793559
445.01	0.803909	0.780659	0.855417	0.813843	0.781504	0.835406
446.05	0.833222	0.811538	0.993516	0.800659	0.772663	0.856334
446.95	0.77228	0.800483	0.980686	0.791041	0.790487	0.886458
448	0.754365	0.724221	0.897614	0.79519	0.772707	0.870269
449.04	0.793436	0.824403	1.00026	0.838438	0.772972	0.869615
449.94	0.795179	0.784984	0.977812	0.81726	0.731198	0.895192
450.98	0.790328	0.865213	1.04125	0.819561	0.725855	0.911056
452.02	0.819071	0.698353	0.935779	0.804199	0.805269	0.944924
453.07	0.806518	0.79193	0.864994	0.760877	0.729668	0.911918
453.97	0.79538	0.777585	0.974523	0.81356	0.739204	0.921864
455.01	0.822002	0.764691	1.01162	0.85086	0.715453	0.928495
456.05	0.800159	0.818233	1.01568	0.786074	0.721041	0.935757
456.95	0.79089	0.825402	0.997822	0.709792	0.736619	0.940232
458	0.800571	0.818481	1.03433	0.809122	0.677287	1.00702
459.02	0.774561	0.817618	0.987909	0.798038	0.652895	0.942377
460.05	0.784117	0.709339	1.03452	0.783312	0.733791	1.00688
460.94	0.792362	0.810524	0.958393	0.825245	0.727036	1.0154
461.97	0.814911	0.78868	1.01531	0.803299	0.7237	0.950828
463	0.784531	0.832379	0.927535	0.778926	0.691494	0.977908
464.02	0.772422	0.846281	0.985853	0.860583	0.679369	0.958709
465.05	0.798944	0.805099	0.953768	0.823405	0.728261	0.983411
465.94	0.805305	0.847873	1.07368	0.801665	0.688602	1.01361
466.97	0.780252	0.759193	1.01435	0.825436	0.677631	1.0417
468	0.812018	0.816395	1.05891	0.834105	0.672307	0.960706
469.04	0.79019	0.796601	0.958172	0.762692	0.673011	1.04629
469.94	0.845362	0.775016	0.991676	0.764102	0.666652	1.03045
470.98	0.784203	0.770554	0.981236	0.83196	0.653934	1.02469
472.02	0.817239	0.777226	0.972203	0.79285	0.642035	1.05013
473.07	0.771466	0.802921	0.993018	0.788194	0.676747	1.00828
473.97	0.793625	0.822283	0.978108	0.739287	0.632469	1.03004
475.01	0.840201	0.833586	0.930704	0.819618	0.697594	1.03319
476.05	0.770884	0.772758	0.902608	0.786498	0.588971	1.02283
476.95	0.79862	0.816351	0.891259	0.803493	0.617628	1.05218
478	0.780092	0.798019	0.925412	0.787428	0.630054	1.0719
479.02	0.795502	0.773442	0.899052	0.798012	0.648094	1.00889
480.05	0.76716	0.709434	0.880162	0.830405	0.633317	0.982039
480.94	0.743746	0.795379	0.851536	0.776945	0.667905	1.01925
481.97	0.781263	0.830734	0.952807	0.73027	0.58505	1.01443
483	0.80812	0.843808	0.847763	0.788445	0.584361	0.942564
484.02	0.816023	0.734362	0.88011	0.737885	0.609082	0.952047
485.05	0.74805	0.727735	0.882414	0.76213	0.592944	0.973145
485.94	0.775289	0.73796	0.830695	0.763776	0.620249	0.918988
486.97	0.740357	0.771782	0.808986	0.70799	0.657066	0.931685
488	0.745753	0.739561	0.838066	0.735839	0.579365	0.952749
489.04	0.737086	0.7828	0.807669	0.744627	0.583958	0.928858
489.94	0.712937	0.74976	0.795285	0.712915	0.596233	0.890297
490.98	0.737067	0.756962	0.761447	0.724502	0.569191	0.891125
492.02	0.718189	0.705341	0.766176	0.733791	0.571903	0.903454
493.07	0.706121	0.72957	0.776564	0.704731	0.575496	0.862595
493.97	0.721414	0.724172	0.699765	0.680439	0.549094	0.87589
495.01	0.694637	0.679861	0.734351	0.76076	0.553549	0.889175
496.05	0.722146	0.60164	0.729448	0.683662	0.550359	0.823777
496.95	0.705029	0.68587	0.652474	0.728233	0.549437	0.795304
498	0.687004	0.598279	0.611736	0.651914	0.517481	0.828734
499.02	0.706668	0.728443	0.618198	0.68538	0.519222	0.799102
500.05	0.654449	0.644862	0.647686	0.67258	0.550382	0.804612
500.94	0.655465	0.704864	0.676431	0.640614	0.475973	0.756156
501.97	0.622605	0.575651	0.57675	0.657404	0.503097	0.76674
503	0.654238	0.647472	0.615298	0.651597	0.533161	0.696448
504.02	0.647821	0.63326	0.557446	0.649564	0.430735	0.70721
505.05	0.665708	0.595437	0.594196	0.672661	0.468614	0.719505
505.94	0.615921	0.662687	0.527128	0.64419	0.459319	0.755674
506.97	0.641572	0.583533	0.574157	0.630665	0.463008	0.687066
508	0.592896	0.615627	0.593315	0.637021	0.465236	0.661451
509.02	0.53691	0.605244	0.598134	0.604932	0.431838	0.641882
510.05	0.613757	0.513104	0.580275	0.58915	0.472444	0.641618
510.94	0.551785	0.453681	0.525837	0.584655	0.47645	0.672057
511.97	0.565595	0.547684	0.559362	0.599618	0.431746	0.671354
513	0.559616	0.570579	0.484519	0.544138	0.374556	0.613386
514.02	0.51597	0.567235	0.50273	0.494792	0.402488	0.56117
515.05	0.516207	0.558261	0.493969	0.58	0.3948	0.571991
515.94	0.528007	0.534879	0.482551	0.510061	0.427387	0.5537
516.97	0.518872	0.579657	0.542068	0.48236	0.41307	0.563335
518	0.510964	0.441456	0.482272	0.511919	0.405838	0.558168
519.02	0.501141	0.497223	0.475175	0.517869	0.375844	0.54348
520.05	0.539138	0.533393	0.405032	0.521021	0.438017	0.539582
520.94	0.498523	0.474609	0.435673	0.495301	0.358206	0.468108
521.97	0.453016	0.505861	0.460432	0.488281	0.379264	0.525001
523	0.451597	0.481444	0.385965	0.461387	0.376025	0.508785
524.02	0.446648	0.442836	0.413895	0.518777	0.367908	0.509511
525.05	0.479641	0.421959	0.39522	0.473558	0.342182	0.479313
525.94	0.432945	0.442808	0.459166	0.455357	0.343216	0.488391
526.97	0.499816	0.465522	0.332321	0.430562	0.346808	0.448994
528	0.424636	0.453409	0.430401	0.460111	0.343978	0.468291
529.01	0.417944	0.413431	0.370443	0.388998	0.312399	0.465448
530.02	0.415625	0.463446	0.373989	0.425014	0.345851	0.491267
531.04	0.384347	0.463135	0.32821	0.370403	0.335382	0.443287
532.05	0.391396	0.422634	0.414067	0.355424	0.304652	0.428567
533.07	0.411485	0.413827	0.351602	0.431488	0.336013	0.40605
533.94	0.379037	0.420181	0.350021	0.377779	0.303106	0.438279
534.95	0.400021	0.40384	0.410025	0.40052	0.317914	0.359704
535.97	0.368137	0.302081	0.324655	0.376436	0.307594	0.363088
536.98	0.357016	0.366137	0.435358	0.37357	0.309787	0.412753
538	0.354521	0.474798	0.304736	0.358692	0.286641	0.34975
539.02	0.351432	0.320536	0.370354	0.376873	0.314301	0.329457
540.05	0.39179	0.288169	0.341897	0.342657	0.262216	0.408762
540.94	0.345508	0.374314	0.277049	0.368605	0.288379	0.329503
541.97	0.342472	0.2701	0.360962	0.354213	0.311828	0.327911
543	0.323761	0.244285	0.30747	0.314317	0.288149	0.350938
544.02	0.340914	0.330053	0.322909	0.327817	0.258585	0.324229
545.05	0.323367	0.282717	0.311191	0.342708	0.261377	0.325851
545.94	0.332712	0.343526	0.316335	0.306648	0.250253	0.360631
546.97	0.298771	0.380837	0.267459	0.306334	0.244726	0.332271
548	0.300604	0.349494	0.291925	0.319653	0.276575	0.316669
549.01	0.272939	0.295126	0.276833	0.30091	0.231976	0.303889
550.02	0.259799	0.318468	0.302145	0.355636	0.210555	0.329765
551.04	0.280176	0.317285	0.233164	0.293646	0.198585	0.292259
552.05	0.260544	0.307294	0.211754	0.281883	0.268727	0.317755
553.07	0.262881	0.272353	0.246982	0.250974	0.200476	0.305255
553.94	0.289196	0.293816	0.286183	0.271075	0.21579	0.287795
554.95	0.276154	0.265518	0.21092	0.265967	0.237726	0.327636
555.97	0.242693	0.27577	0.182424	0.272361	0.21472	0.291213
556.98	0.234483	0.30652	0.224691	0.311378	0.199689	0.296824
558	0.262093	0.208429	0.279507	0.245288	0.196565	0.2623
559.01	0.285309	0.287307	0.214454	0.212091	0.223167	0.233015
560.02	0.245543	0.297614	0.229976	0.26188	0.183269	0.227642
561.04	0.244412	0.274058	0.222772	0.218717	0.226788	0.221068
562.05	0.219872	0.32103	0.236238	0.238362	0.173671	0.219791
563.07	0.237642	0.305973	0.199238	0.266325	0.220181	0.277135
563.94	0.241017	0.129146	0.174696	0.233965	0.187844	0.263361
564.95	0.220252	0.30316	0.154612	0.216498	0.184261	0.258587
565.97	0.20231	0.200415	0.197378	0.24769	0.166342	0.190519
566.98	0.24667	0.174227	0.252775	0.222004	0.19203	0.221689
568	0.205558	0.260875	0.187526	0.254849	0.170697	0.221913
569.01	0.265234	0.20637	0.20097	0.20248	0.195395	0.181558
570.02	0.183091	0.267255	0.156582	0.251837	0.226262	0.24542
571.04	0.262155	0.183023	0.219139	0.178831	0.172781	0.256688
572.05	0.210161	0.199662	0.153198	0.201379	0.16165	0.205105
573.07	0.204887	0.1999	0.16743	0.224064	0.138113	0.164155
573.94	0.194298	0.259896	0.133834	0.209281	0.143579	0.173608
574.95	0.170647	0.129385	0.138327	0.213539	0.160915	0.217977
575.97	0.180854	0.214697	0.186986	0.136702	0.178685	0.20721
576.97	0.216936	0.168972	0.167878	0.218778	0.172133	0.18256
578	0.220628	0.166581	0.177139	0.181201	0.156624	0.224974
579.02	0.191118	0.161118	0.205477	0.184309	0.14052	0.166156
580.05	0.212906	0.228874	0.12532	0.167592	0.132124	0.17536
580.94	0.178991	0.214161	0.138222	0.196128	0.14752	0.182132
581.97	0.190033	0.12371	0.156686	0.144908	0.14182	0.150755
583	0.161041	0.220438	0.210516	0.205642	0.196821	0.220405
584.02	0.16022	0.167462	0.162544	0.174329	0.133167	0.125001
585.05	0.155179	0.179407	0.187526	0.187802	0.132653	0.154292
585.94	0.161683	0.100586	0.147959	0.228172	0.14715	0.147424
586.97	0.152361	0.191326	0.129833	0.164108	0.149193	0.172332
588	0.18813	0.135003	0.144324	0.196168	0.149373	0.133796
589.01	0.107469	0.136246	0.106196	0.186174	0.142147	0.208728
590.02	0.147523	0.279061	0.0818729	0.139978	0.154389	0.187752
591.04	0.132851	0.252546	0.0768443	0.145302	0.150548	0.186051
592.05	0.14087	0.173667	0.133967	0.150496	0.121452	0.14081
593.07	0.154447	0.0532825	0.136658	0.170655	0.127279	0.136373
593.94	0.143604	0.0775323	0.142468	0.183219	0.123895	0.149072
594.95	0.11458	0.11003	0.110195	0.130586	0.104738	0.117827
595.97	0.129138	0.208603	0.0666534	0.185065	0.122058	0.135703
596.98	0.15296	0.0540621	0.0645881	0.11698	0.110302	0.143631
598	0.126445	0.167591	0.158469	0.117222	0.108827	0.14777
599.02	0.116241	0.130374	0.194967	0.114541	0.112941	0.138026
600.05	0.121773	0.162018	0.150772	0.100116	0.102843	0.102702
