# Supplementary material for: Concerted conformational dynamics and water movements in the ghrelin G protein-coupled receptor
Source: eLife. 2021 Sep 3;10:e63201. doi: 10.7554/eLife.63201 (PMC8416020; doi:10.7554/eLife.63201)
Supplement: Figure 2—figure supplement 6—source data 1. [file elife-63201-fig2-figsupp6-data1.xlsx]

## Sheet: fig2 S6
wavelength (nm)	apo	JMV3011	ghrelin	JMV3002	SPA	ghrelin_PIP2
374.96	0.4837	0.454061	0.423053	0.426045	0.35375	0.474568
376.03	0.507785	0.511389	0.511283	0.454248	0.32492	0.514721
376.93	0.469983	0.470281	0.369149	0.43414	0.352678	0.472277
378	0.416268	0.591629	0.429163	0.429291	0.309744	0.511009
379.06	0.496435	0.482179	0.524694	0.480792	0.335216	0.541264
379.96	0.569316	0.577031	0.510047	0.465789	0.391784	0.567108
381.03	0.531864	0.521199	0.392052	0.504845	0.364009	0.549857
381.93	0.60071	0.534807	0.496814	0.458145	0.412294	0.60303
383	0.525283	0.501687	0.51571	0.483149	0.428204	0.599502
384.06	0.493877	0.561594	0.515337	0.499208	0.364104	0.657022
384.96	0.544416	0.642852	0.576541	0.513343	0.40433	0.649044
386.03	0.548535	0.674709	0.622605	0.50079	0.429557	0.64607
386.93	0.480622	0.610757	0.57522	0.551016	0.436772	0.739132
388	0.611295	0.615564	0.647775	0.562226	0.47553	0.681144
389.06	0.575076	0.721802	0.624934	0.559965	0.466524	0.760532
389.96	0.509693	0.604984	0.623954	0.616294	0.402289	0.724429
391.03	0.640159	0.637548	0.565415	0.586265	0.37468	0.778438
391.93	0.671674	0.711535	0.698714	0.640777	0.44963	0.757069
393	0.749916	0.738328	0.692385	0.659176	0.474373	0.770607
394.06	0.74251	0.778087	0.689053	0.644591	0.446751	0.747165
394.96	0.62222	0.708255	0.674705	0.649938	0.492236	0.729586
396.03	0.827715	0.799824	0.675049	0.631239	0.421841	0.808328
396.93	0.768974	0.76352	0.75036	0.70335	0.446616	0.79781
398	0.797972	0.796544	0.797395	0.713339	0.453869	0.788954
399.04	0.821065	0.856121	0.822817	0.756181	0.4337	0.853323
399.94	0.915686	0.944897	0.838174	0.741574	0.519532	0.878247
400.98	0.787975	0.935137	0.759884	0.725214	0.488254	0.886696
402.02	0.896755	0.906379	0.84273	0.793157	0.463673	0.871076
403.07	0.918083	0.927193	0.918084	0.760846	0.479966	0.909542
403.97	0.81606	0.936433	0.900631	0.809612	0.511405	0.93752
405.01	0.911683	0.964854	0.858864	0.800803	0.531485	0.937468
406.05	0.938697	0.898698	0.938264	0.826611	0.541677	0.916313
406.95	0.864271	1.04694	0.880471	0.812065	0.504742	0.994524
408	1.00851	1.0365	0.913293	0.859813	0.511821	0.878083
409.06	0.920983	1.00325	1.03458	0.866415	0.511235	0.948039
409.96	0.945349	1.0384	0.918589	0.879155	0.577131	0.940331
411.03	1.04746	0.946063	1.04027	0.887633	0.490264	0.928049
411.93	0.950453	0.987603	0.933275	0.905492	0.535661	0.922427
413	0.976499	0.99223	0.963316	0.907552	0.577114	0.896603
414.06	0.976059	1.04893	0.916238	0.930815	0.515624	1.00479
414.96	1.00576	0.946423	0.951467	0.944488	0.507467	0.993749
416.03	1.00656	1.02893	0.99888	0.937436	0.503469	0.957273
416.93	1.0437	1.00308	0.996107	0.936294	0.547342	0.935626
418	1.00402	0.998519	0.953532	0.96649	0.591371	0.97527
419.04	1.00805	1.00014	0.967586	0.940172	0.560533	1.01581
419.94	0.961089	1.01556	1.04008	0.956598	0.592148	0.978752
420.98	1.0462	1.0635	0.94084	0.97531	0.536511	0.976038
422.02	1.05447	1.03412	0.915062	0.976691	0.574374	0.963029
423.07	0.934971	0.954924	0.991964	0.995108	0.564907	0.948886
423.97	0.799008	0.986457	0.928621	0.951769	0.580236	0.984078
425.01	0.964625	0.999462	1.04254	1.00938	0.554646	1.00589
426.05	0.848855	0.902535	0.896949	0.98047	0.560362	1.00911
426.95	1.00445	0.977258	0.929634	1.0244	0.560431	0.975907
428	0.855212	0.988927	0.932392	0.991765	0.650185	0.965387
429.06	0.980293	0.921545	0.961892	0.988826	0.545047	0.945927
429.96	0.918023	0.919959	0.975824	1.01491	0.609311	0.992237
431.03	0.892674	0.906202	0.891527	1.01473	0.640571	1.04295
431.93	0.898568	0.935233	0.922903	1.01643	0.612151	1.00381
433	0.783257	0.935751	0.900994	1.01267	0.6166	0.962866
434.06	0.930609	0.848653	1.01807	1.02723	0.616083	0.98496
434.96	0.806598	0.857386	0.868289	1.02307	0.610298	0.987393
436.03	0.852814	0.841658	0.884882	1.00335	0.644179	0.963622
436.93	0.929115	0.867581	0.971673	1.02694	0.582467	0.965217
438	0.841561	0.865733	0.881648	1.02683	0.659477	0.949479
439.04	0.840097	0.843326	0.913944	1.00756	0.621164	1.01723
439.94	0.910718	0.908205	1.00781	0.9505	0.63199	0.968728
440.98	0.766029	0.884982	0.912259	0.998303	0.642722	0.916634
442.02	0.864239	0.842474	0.964157	0.997789	0.603054	1.02223
443.07	0.958255	0.937324	0.973044	1.01467	0.619647	0.887346
443.97	0.866082	0.833831	0.903375	0.972465	0.691653	0.964172
445.01	0.8541	0.861581	0.858186	1.00248	0.613314	0.93647
446.05	0.793331	0.796094	0.928541	0.996683	0.703363	0.881473
446.95	0.855743	0.905393	0.986569	1.04605	0.666915	0.963366
448	0.842223	0.813084	0.908765	0.967555	0.690069	0.895277
449.04	0.866757	0.913717	0.891514	1.02196	0.644892	0.896703
449.94	0.948648	0.85657	1.04205	1.0102	0.729483	0.865406
450.98	0.894912	0.879189	0.986999	1.00372	0.769109	0.922724
452.02	0.994726	0.855595	0.981817	0.998218	0.789759	0.925325
453.07	0.87708	0.926206	0.926596	0.998567	0.716797	0.893969
453.97	0.790076	0.880866	0.881281	1.02073	0.767045	0.895598
455.01	0.854824	0.869189	0.996068	0.972801	0.795826	0.898052
456.05	1.00257	0.912952	0.827054	1.00283	0.749996	0.837864
456.95	0.9779	0.82291	0.930699	0.995206	0.769463	0.899008
458	0.922899	0.905322	0.915929	0.980404	0.776827	0.883075
459.02	1.00876	0.888602	0.929781	1.02103	0.807459	0.856454
460.05	0.976673	0.937422	0.973767	1.02004	0.813181	0.839812
460.94	0.921213	0.955205	0.933657	0.971418	0.799888	0.825552
461.97	0.980666	0.872986	0.899799	0.974599	0.814486	0.839497
463	0.856385	0.96561	0.903121	0.955732	0.859733	0.837083
464.02	0.893326	0.913203	0.839142	0.962659	0.830907	0.765293
465.05	0.814036	0.91254	0.885658	0.946285	0.906124	0.769832
465.94	1.00965	0.906956	0.916547	0.925803	0.880463	0.806917
466.97	0.985764	0.993345	0.878494	0.92604	0.888351	0.819926
468	0.975881	0.937734	0.885159	0.909344	0.850802	0.813892
469.04	1.013	0.944613	0.73298	0.891355	0.916532	0.743268
469.94	0.949125	0.88417	0.786848	0.894122	0.901056	0.733766
470.98	0.972584	0.965571	0.826058	0.877356	0.927884	0.792355
472.02	0.958332	0.93466	0.921701	0.868438	0.917579	0.752441
473.07	1.00624	1.00568	0.756555	0.844483	1.00582	0.704512
473.97	0.910024	1.00752	0.885999	0.88416	0.955465	0.743947
475.01	0.939297	1.00094	0.855348	0.883053	0.950854	0.711423
476.05	1.01181	0.99393	0.861506	0.879232	0.960666	0.694309
476.95	0.846138	0.998554	0.822389	0.821942	0.949249	0.721581
478	0.936481	1.01993	0.777896	0.815519	0.957493	0.673947
479.02	1.05506	1.03815	0.856922	0.811747	0.980235	0.646318
480.05	1.00846	1.04457	0.794433	0.800867	0.971423	0.737515
480.94	1.00385	0.962592	0.724413	0.78725	0.94121	0.67486
481.97	1.02373	0.948151	0.840367	0.769684	0.941832	0.644081
483	1.02524	1.02514	0.722945	0.801419	0.948948	0.624347
484.02	0.969391	1.00817	0.755643	0.722982	1.05805	0.614794
485.05	1.08799	1.02135	0.66235	0.75853	0.969494	0.644983
485.94	0.996309	0.95657	0.697564	0.742449	1.06595	0.665793
486.97	1.1146	0.945577	0.644309	0.744099	1.0267	0.617028
488	1.03109	1.02354	0.774822	0.683082	0.985932	0.565237
489.04	0.908505	1.04812	0.745935	0.677741	0.991974	0.579647
489.94	1.06134	1.04313	0.628152	0.697082	1.03836	0.621534
490.98	1.07708	1.01236	0.711842	0.655312	1.05996	0.593226
492.02	0.939378	0.93473	0.628376	0.689143	1.00184	0.566377
493.07	0.939215	0.984048	0.494738	0.622736	1.02126	0.550205
493.97	0.946127	0.984569	0.720434	0.670189	1.02222	0.492185
495.01	0.937195	0.949807	0.586489	0.67005	0.968928	0.554958
496.05	1.03044	1.02287	0.536412	0.621351	1.01543	0.558717
496.95	0.957756	1.00396	0.537326	0.599439	0.979229	0.543887
498	0.830341	0.969965	0.517632	0.586658	1.01907	0.486909
499.02	0.920704	1.05659	0.645633	0.596603	1.00098	0.535299
500.05	0.922905	0.965208	0.591802	0.559496	0.987166	0.436949
500.94	0.945611	0.86049	0.58018	0.567939	0.97763	0.538431
501.97	1.00766	0.877548	0.628447	0.5661	0.989562	0.516238
503	0.873028	0.913283	0.565683	0.572062	0.951762	0.499548
504.02	0.943919	0.882346	0.489437	0.511589	0.949669	0.500741
505.05	0.933143	0.867535	0.537039	0.543933	0.978343	0.43604
505.94	0.915871	0.909129	0.498363	0.524585	0.889408	0.483579
506.97	0.789401	0.881305	0.528593	0.48948	0.860628	0.440135
508	0.826273	0.933591	0.374626	0.492473	0.91363	0.448117
509.02	0.723342	0.791175	0.487587	0.490989	0.939192	0.425324
510.05	0.870588	0.810713	0.422128	0.472223	0.86548	0.446802
510.94	0.692282	0.873097	0.486893	0.469459	0.86903	0.433966
511.97	0.84718	0.777018	0.470788	0.468444	0.82125	0.36512
513	0.760484	0.768124	0.416488	0.435688	0.88548	0.399255
514.02	0.803306	0.813611	0.402989	0.421183	0.892644	0.3722
515.05	0.825707	0.797279	0.38108	0.439345	0.837633	0.363056
515.94	0.723967	0.755085	0.400979	0.419715	0.798321	0.410153
516.97	0.738605	0.701013	0.402451	0.395626	0.838982	0.390322
518	0.689104	0.721248	0.449014	0.410658	0.791363	0.364927
519.02	0.735632	0.671285	0.485251	0.381551	0.745092	0.376704
520.05	0.642441	0.673661	0.389971	0.3544	0.774335	0.364249
520.94	0.653617	0.660944	0.431876	0.405933	0.747694	0.357401
521.97	0.705643	0.643835	0.339179	0.370994	0.744743	0.361872
523	0.705538	0.663786	0.400601	0.324057	0.723413	0.377283
524.02	0.672927	0.685577	0.266575	0.343749	0.771099	0.377304
525.05	0.622093	0.631443	0.347955	0.369059	0.70362	0.279703
525.94	0.588662	0.714662	0.394811	0.370639	0.697658	0.317135
526.97	0.57437	0.638941	0.229428	0.329497	0.639705	0.309777
528	0.578859	0.623644	0.293711	0.291106	0.701915	0.303354
529.01	0.713875	0.586194	0.251575	0.363911	0.608715	0.270543
530.02	0.516789	0.59662	0.28695	0.323327	0.612697	0.324825
531.04	0.592991	0.575929	0.285487	0.285812	0.670209	0.291816
532.05	0.6058	0.568098	0.215314	0.328758	0.590923	0.326646
533.07	0.627043	0.585411	0.233938	0.325798	0.628225	0.270724
533.94	0.456836	0.517646	0.271047	0.293501	0.696689	0.315719
534.95	0.554269	0.52346	0.227327	0.315738	0.596293	0.257162
535.97	0.51496	0.504875	0.270693	0.29356	0.576357	0.259387
536.98	0.561998	0.473223	0.236478	0.316506	0.568882	0.264086
538	0.496187	0.516471	0.25063	0.302303	0.542363	0.246285
539.02	0.493314	0.445764	0.185042	0.282763	0.526395	0.286165
540.05	0.489572	0.469689	0.169779	0.295079	0.536361	0.238754
540.94	0.468583	0.443683	0.196418	0.253913	0.500361	0.229776
541.97	0.403371	0.49271	0.189126	0.27498	0.475566	0.210582
543	0.42107	0.473358	0.258554	0.210701	0.546898	0.223124
544.02	0.523213	0.457007	0.253441	0.234059	0.444268	0.246551
545.05	0.473357	0.429027	0.323174	0.224841	0.486451	0.17651
545.94	0.384719	0.427047	0.230612	0.242965	0.422273	0.196669
546.97	0.470923	0.464321	0.267225	0.254956	0.50565	0.165785
548	0.414682	0.38238	0.227761	0.253258	0.449513	0.243925
549.01	0.496856	0.408529	0.16505	0.206206	0.439886	0.222555
550.02	0.275529	0.40459	0.204188	0.219341	0.437609	0.214342
551.04	0.307695	0.469302	0.19124	0.280785	0.38867	0.184684
552.05	0.374815	0.360396	0.254157	0.236559	0.406068	0.199405
553.07	0.303825	0.387934	0.178295	0.21524	0.394839	0.14833
553.94	0.26214	0.306716	0.235574	0.21488	0.419922	0.188317
554.95	0.396802	0.351611	0.217982	0.183926	0.394938	0.220928
555.97	0.359915	0.32139	0.102734	0.205489	0.367294	0.180427
556.98	0.394922	0.397838	0.164177	0.176769	0.378808	0.184872
558	0.352418	0.333468	0.121104	0.150341	0.304237	0.20054
559.01	0.322529	0.36049	0.213687	0.206929	0.362154	0.161448
560.02	0.296367	0.386364	0.204801	0.190853	0.380078	0.130391
561.04	0.456303	0.295521	0.167443	0.194542	0.341134	0.119501
562.05	0.238375	0.281844	0.23578	0.208627	0.358992	0.196928
563.07	0.325544	0.345949	0.122667	0.211956	0.349353	0.140989
563.94	0.30264	0.299296	0.0854739	0.189019	0.342665	0.163313
564.95	0.269362	0.266081	0.11977	0.169089	0.314812	0.14194
565.97	0.301416	0.306678	0.141774	0.183614	0.304319	0.12527
566.98	0.328589	0.300513	0.152281	0.173849	0.339325	0.116063
568	0.231109	0.276487	0.275316	0.16953	0.274257	0.153314
569.01	0.305352	0.321513	0.145444	0.179647	0.314965	0.142838
570.02	0.360567	0.289157	0.187657	0.175678	0.311019	0.113136
571.04	0.227809	0.365283	0.214345	0.186722	0.254703	0.0930911
572.05	0.258032	0.288166	0.191416	0.180286	0.341804	0.117966
573.07	0.237564	0.280342	0.181932	0.137346	0.23607	0.108527
573.94	0.253469	0.243615	0.244923	0.198909	0.279381	0.114791
574.95	0.295672	0.307639	0.115874	0.175594	0.236077	0.104704
575.97	0.275871	0.201564	0.133998	0.134282	0.253826	0.0623473
576.97	0.238175	0.245527	0.179561	0.163559	0.273654	0.129919
578	0.224192	0.195441	0.091298	0.0981596	0.231195	0.15777
579.02	0.214111	0.27033	0.163896	0.153923	0.250159	0.0491128
580.05	0.159679	0.246852	0.16497	0.109273	0.281365	0.107029
580.94	0.223873	0.237128	0.103499	0.175856	0.293402	0.104792
581.97	0.200314	0.237932	0.122406	0.171065	0.20426	0.10201
583	0.128941	0.293319	0.160131	0.12009	0.197532	0.0698875
584.02	0.250898	0.236781	0.223444	0.150792	0.191196	0.0456356
585.05	0.249937	0.229853	0.0502732	0.134154	0.260007	0.0166337
585.94	0.149536	0.22288	0.0975502	0.0905872	0.246993	0.102359
586.97	0.168431	0.211704	0.111123	0.13001	0.257473	0.0674313
588	0.238529	0.214787	0.174472	0.110881	0.203178	0.117236
589.01	0.305573	0.17152	0.0941741	0.165013	0.232729	0.116792
590.02	0.258902	0.139734	0.032705	0.136596	0.253538	0.0899494
591.04	0.187246	0.238549	0.040925	0.154407	0.176464	0.0130556
592.05	0.0591587	0.184205	0.0597961	0.132765	0.1699	0.0660663
593.07	0.246232	0.225897	0.136554	0.126095	0.188583	0.0750974
593.94	0.195656	0.182466	0.0585853	0.129354	0.212767	0.0619419
594.95	0.222669	0.176652	0.1402	0.118904	0.174806	0.0470521
595.97	0.242265	0.221688	0.063839	0.139452	0.206585	0.0480965
596.98	0.257701	0.187704	0.198661	0.113207	0.220104	0.0137847
598	0.177864	0.242535	0.0864726	0.110985	0.15589	0.0815641
599.02	0.19664	0.215572	0.128388	0.135096	0.0997573	0.0490057
600.05	0.160814	0.2095	0.126647	0.105868	0.213246	0.0777682
