# Supplementary material for: Concerted conformational dynamics and water movements in the ghrelin G protein-coupled receptor
Source: eLife. 2021 Sep 3;10:e63201. doi: 10.7554/eLife.63201 (PMC8416020; doi:10.7554/eLife.63201)
Supplement: Figure 2—source data 1. [file elife-63201-fig2-data1.xlsx]

## Sheet: figure 2
	apo			ghrelin			JMV3011			JMV3002			SPA
	replicate 1	replicate 2	replicate 3	replicate 1	replicate 2	replicate 3	replicate 1	replicate 2	replicate 3	replicate 1	replicate 2	replicate 3	replicate 1	replicate 2	replicate 3
3.43	65.11	67.92	66.23	68.24	63.92	67.2	62.25	63.97	62.73	67.89	65.22	66.89	67.13	67.15	65.85
5.58	25.83	26.98	27.75	48.83	49.38	47.22	24.19	26.01	26.56	26.59	27.63	28.26	15.46	17.77	15.85
6.4	62.68	64.98	63.82	61.86	65.16	62.17	64.53	63.48	65.36	66.83	65.42	67.29	65.89	63.99	65.85
6.44	34.92	36.11	36.96	21.07	20.32	19.11	34.06	36.74	35.98	24.24	22.63	23.15	57.98	56.11	57.42
7.45	23.13	22.02	20.02	24.96	23.88	21.19	21.2	22.69	23.47	21.56	20.44	18.97	22.39	23.69	24.59
