# Supplementary material for: Concerted conformational dynamics and water movements in the ghrelin G protein-coupled receptor
Source: eLife. 2021 Sep 3;10:e63201. doi: 10.7554/eLife.63201 (PMC8416020; doi:10.7554/eLife.63201)
Supplement: Figure 5—source data 1. [file elife-63201-fig5-data1.xlsx]

## Sheet: figure 5
	no PIP2			PIP2
	replicate 1	replicate 2	replicate 3	replicate 1	replicate 2	replicate 3
5.58	49.568	47.078	48.124	60.136	58.145	61.325
6.44	18.095	20.174	21.958	15.658	15.178	13.342
