# Supplementary material for: Concerted conformational dynamics and water movements in the ghrelin G protein-coupled receptor
Source: eLife. 2021 Sep 3;10:e63201. doi: 10.7554/eLife.63201 (PMC8416020; doi:10.7554/eLife.63201)
Supplement: Supplementary file 1. [file elife-63201-supp1.xlsx]

## Sheet: Feuille1
Step number	Simulation ensemble	Integration step (fs)	Simulation time (ps)	Harmonic restraints on backbone atoms (in kJ.mol-1.nm-2)	Harmonic restraints on side-chain atoms (in kJ.mol-1.nm-2)	Harmonic restraints on lipid atoms (in kJ.mol-1.nm-2)
1	NVT	1	125	4000	2000	1000
2	NVT	1	125	4000	2000	400
3	NPT	1	125	1000	500	400
4	NPT	2	500	1000	500	200
5	NPT	2	500	1000	500	40
6	NPT	2	1000	1000	500	0
7	NPT	2	1000	500	200	0
8	NPT	2	1000	200	50	0
9	NPT	2	1000	50	0	0
